# Supplementary material
Source: PubMed Central journal article supplement (PMC2891898)
Supplement: NIHMS105988-supplement-1_si_001.pdf [file NIHMS105988-supplement-1_si_001.pdf]

**–Supporting Information for–**

A “shortcut” Mosher ester method to assign configurations of stereocenters in nearly symmetric environments. Fluorous mixture synthesis and structure assignment of petrocortyne A

Dennis P. Curran\* and Bin Sui

Department of Chemistry, University of Pittsburgh, Pittsburgh PA, 15260

curran@pitt.edu

**Table of Contents**

|                                                                                 |   |
|---------------------------------------------------------------------------------|---|
| Schemes S1–S3, syntheses of fragments <b>5</b> , <b>9</b> , and <b>14</b> ..... | 2 |
| Table S1, summary of Mosher ester spectra .....                                 | 4 |
| Copies of <sup>1</sup> H and <sup>13</sup> C NMR spectra .....                  | 5 |

**Scheme S1. Synthesis of fragment 5**

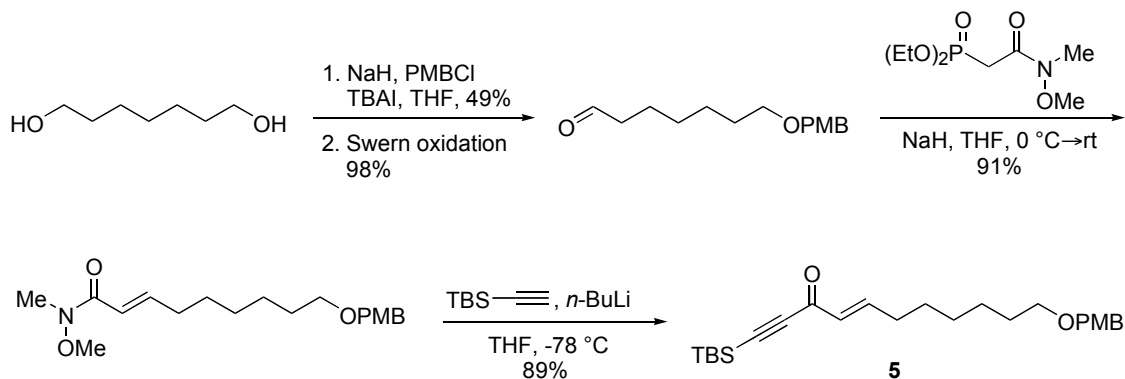

**Scheme S2. Synthesis of fragment 9**

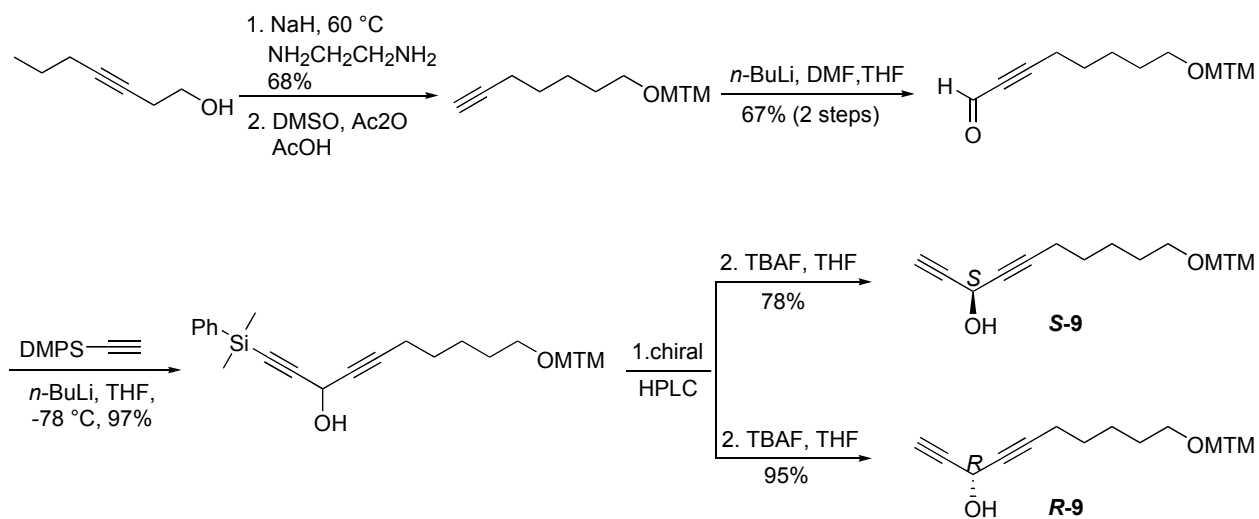

**Scheme S3. Synthesis of fragment 14**

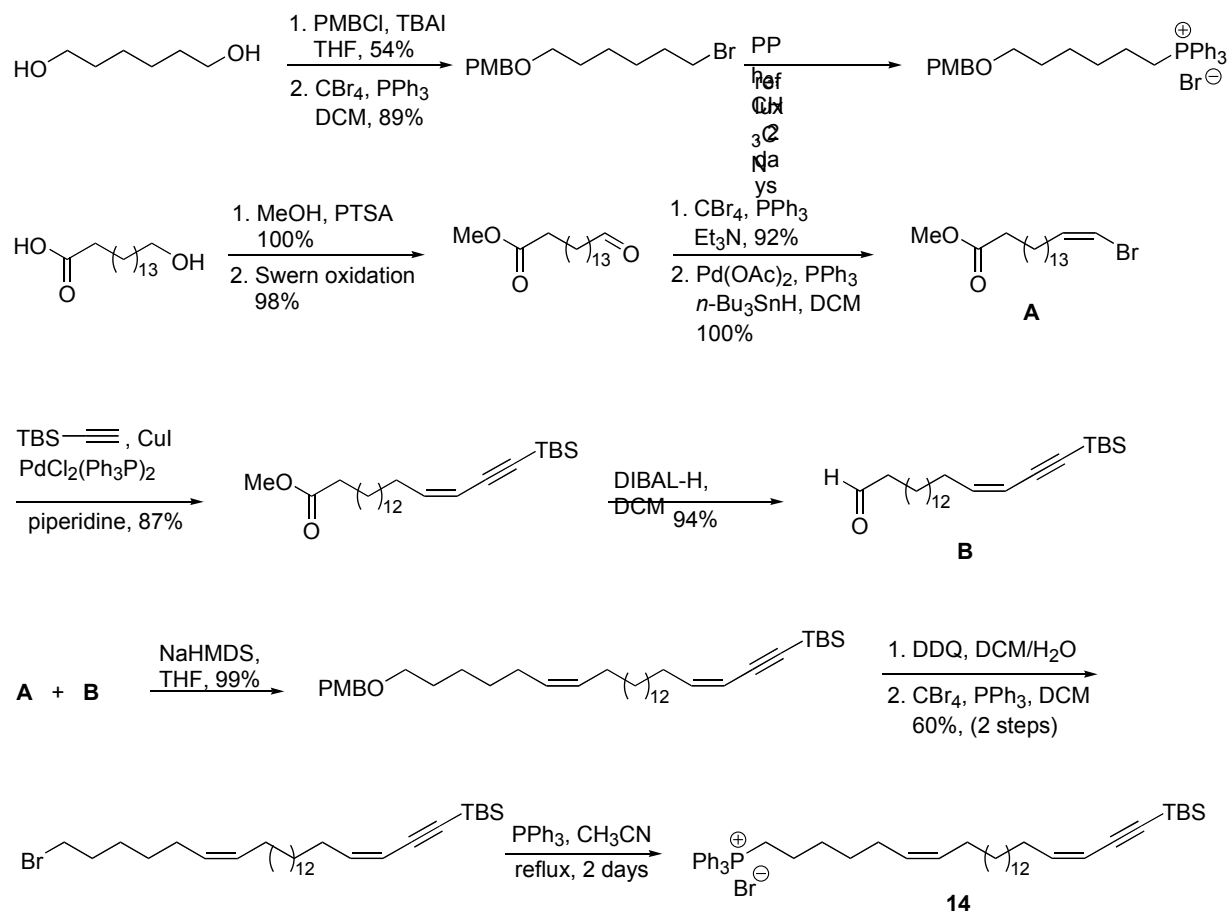

**Table S1. Chemical shifts in ppm of relevant protons in pairs of Mosher esters and subtraction results. Top, Mosher esters of SR-4. Bottom, Mosher esters of SS-4**

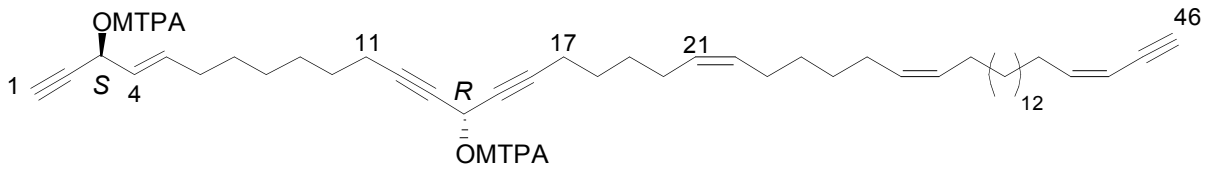

The chemical structure shows a long-chain molecule with two stereocenters, S and R, each bearing an OMTPA group. The chain contains several double bonds and a terminal triple bond. Protons are labeled with numbers 1, 3, 4, 5, 6, 11, 14, 17, and 18. The OMTPA groups are attached to carbons 4 and 11.

|                               | H1    | 3     | 4      | 5      | 6      | 11    | 14    | 17     | 18     |
|-------------------------------|-------|-------|--------|--------|--------|-------|-------|--------|--------|
| $\delta$ S-MTPA               | 2.632 | 6.023 | 5.490  | 5.998  | 2.036  | 2.214 | 6.210 | 2.204  | 1.487  |
| $\delta$ R-MTPA               | 2.591 | 6.008 | 5.601  | 6.057  | 2.077  | 2.190 | 6.214 | 2.233  | 1.515  |
| $\delta(\delta S - \delta R)$ | 0.041 | NA    | -0.111 | -0.059 | -0.041 | 0.024 | NA    | -0.029 | -0.027 |

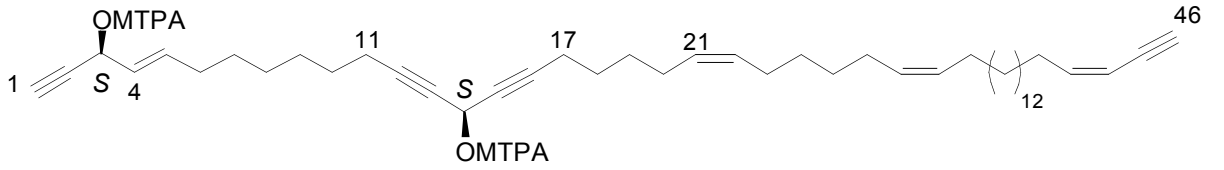

The chemical structure shows a long-chain molecule with two stereocenters, S and S, each bearing an OMTPA group. The chain contains several double bonds and a terminal triple bond. Protons are labeled with numbers 1, 3, 4, 5, 6, 11, 14, 17, and 18. The OMTPA groups are attached to carbons 4 and 11.

|                               | H1    | 3     | 4      | 5      | 6      | 11     | 14    | 17    | 18    |
|-------------------------------|-------|-------|--------|--------|--------|--------|-------|-------|-------|
| $\delta$ S-MTPA               | 2.628 | 6.026 | 5.494  | 5.992  | 2.036  | 2.185  | 6.210 | 2.230 | 1.516 |
| $\delta$ R-MTPA               | 2.590 | 6.001 | 5.594  | 6.053  | 2.074  | 2.219  | 6.208 | 2.204 | 1.492 |
| $\delta(\delta S - \delta R)$ | 0.038 | NA    | -0.100 | -0.061 | -0.037 | -0.034 | NA    | 0.026 | 0.024 |

The protons were assigned by COSY and TOSCY spectra. NA = does not apply; the protons on the carbon bearing the Mosher ester are not used in the Mosher subtraction.











BS5P40 peak 3 RF(4, 3) After deprotection CDCl3 600 Bins 02/17/08

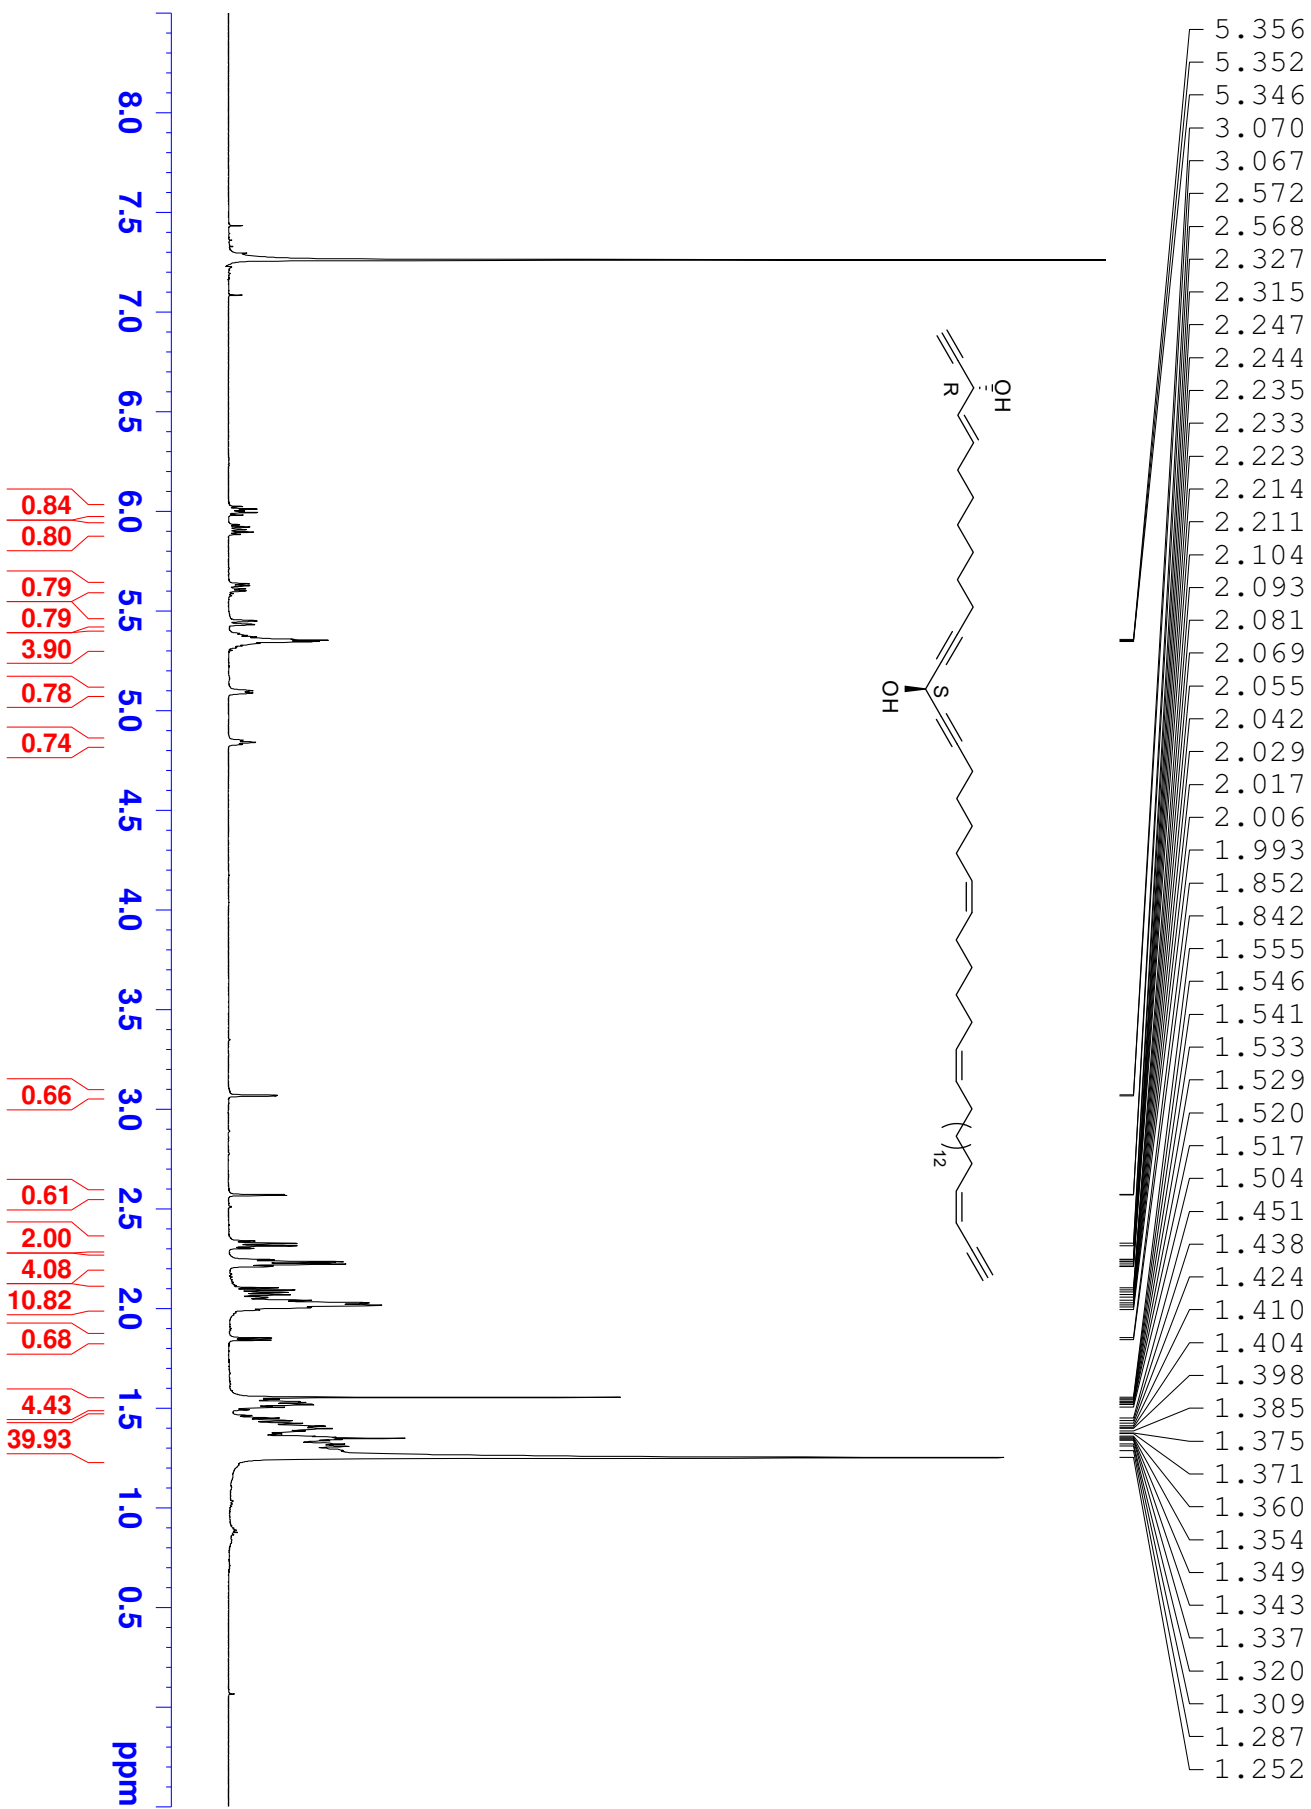

B55P40 peak 3 Rf(4, 3) After deprotection <sup>13</sup>CNMR CDCl<sub>3</sub> 600 Bins 02/17/08

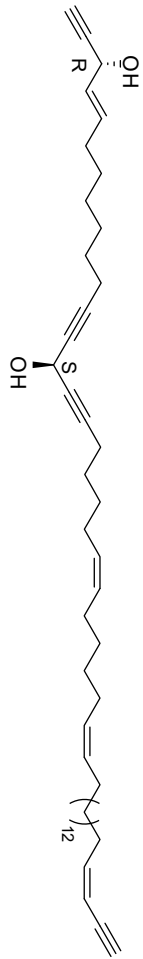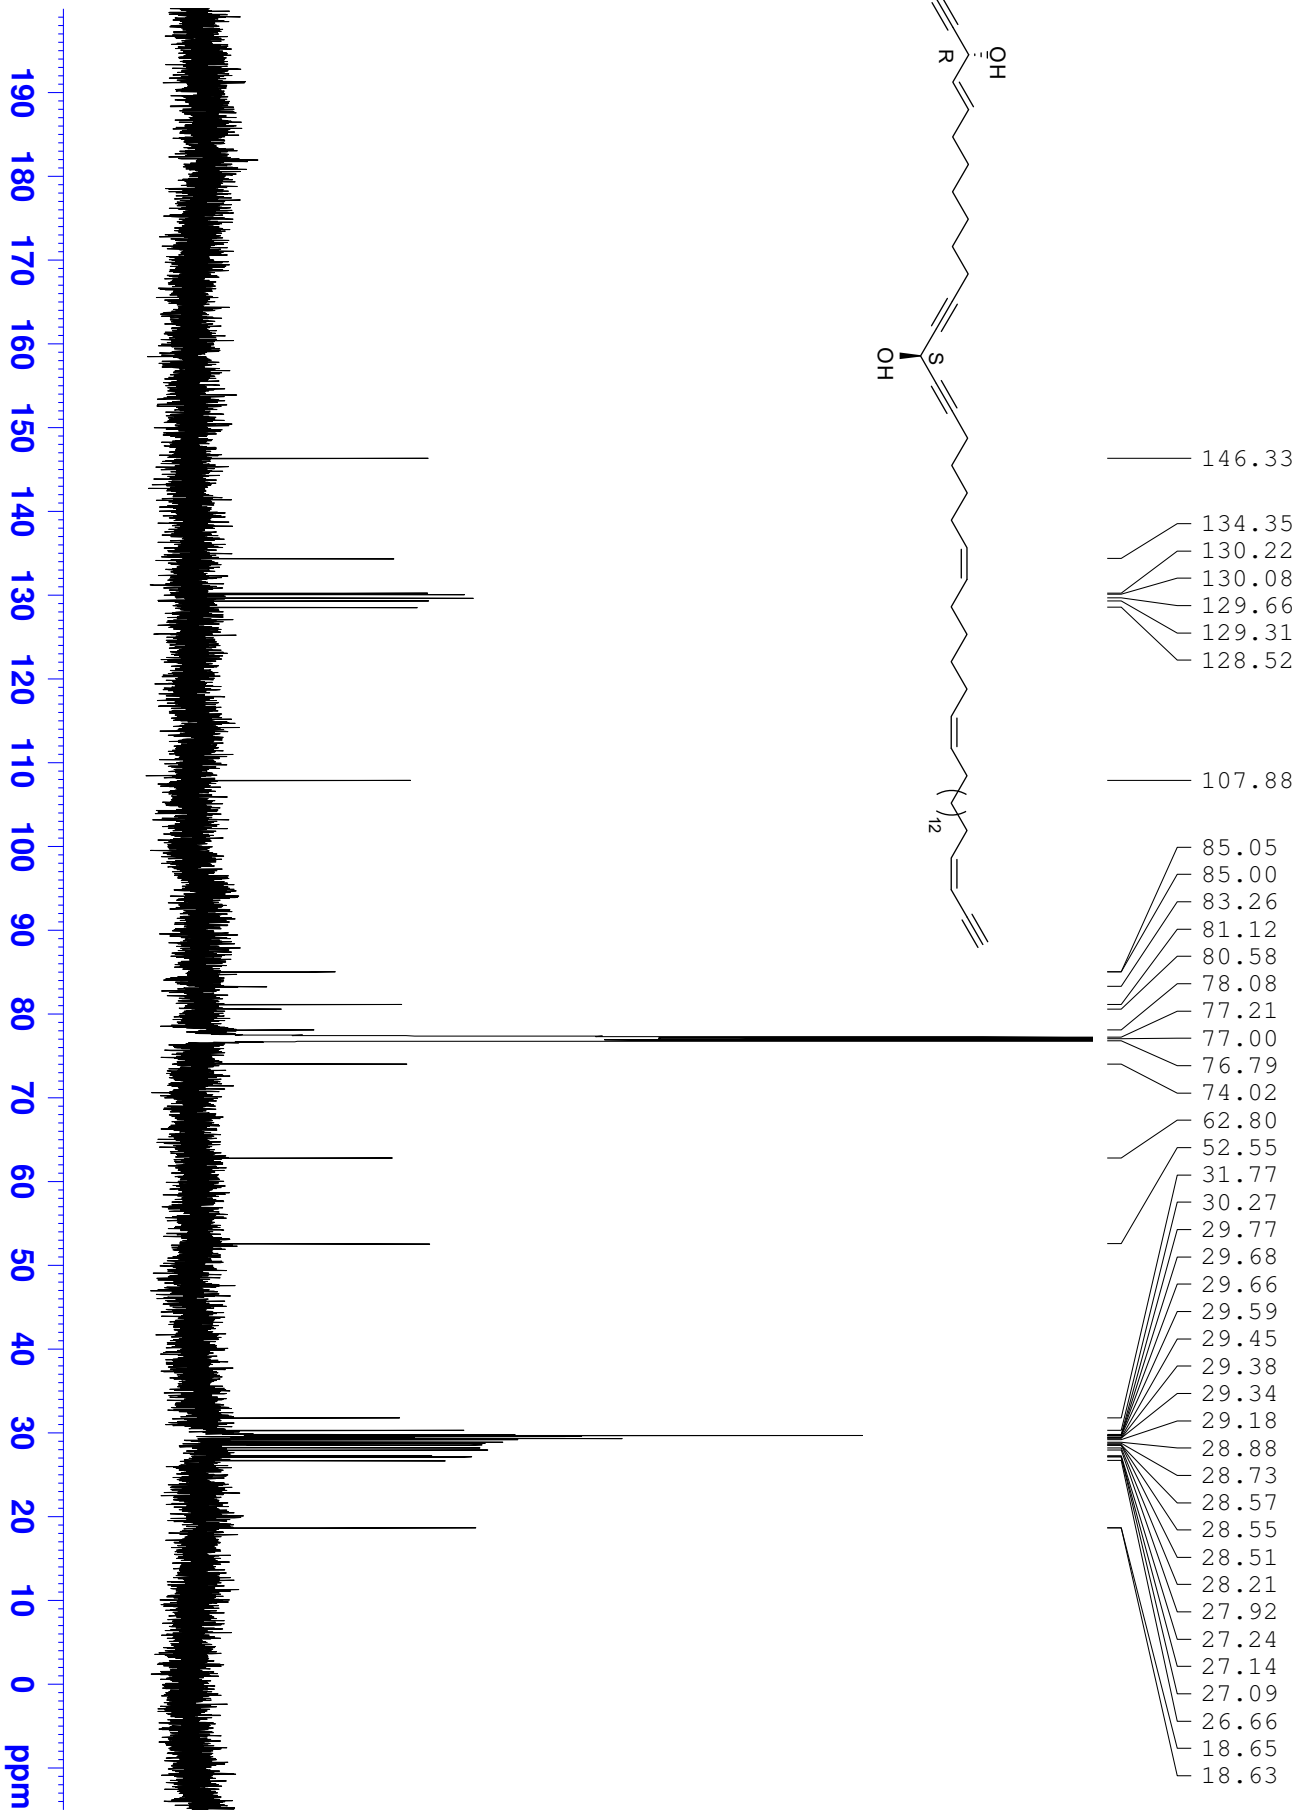

BSSP40 peak 4 RF(4, 4) After deprotection <sup>13</sup>CNMR CDCl<sub>3</sub> 600 Bins 02/18/08

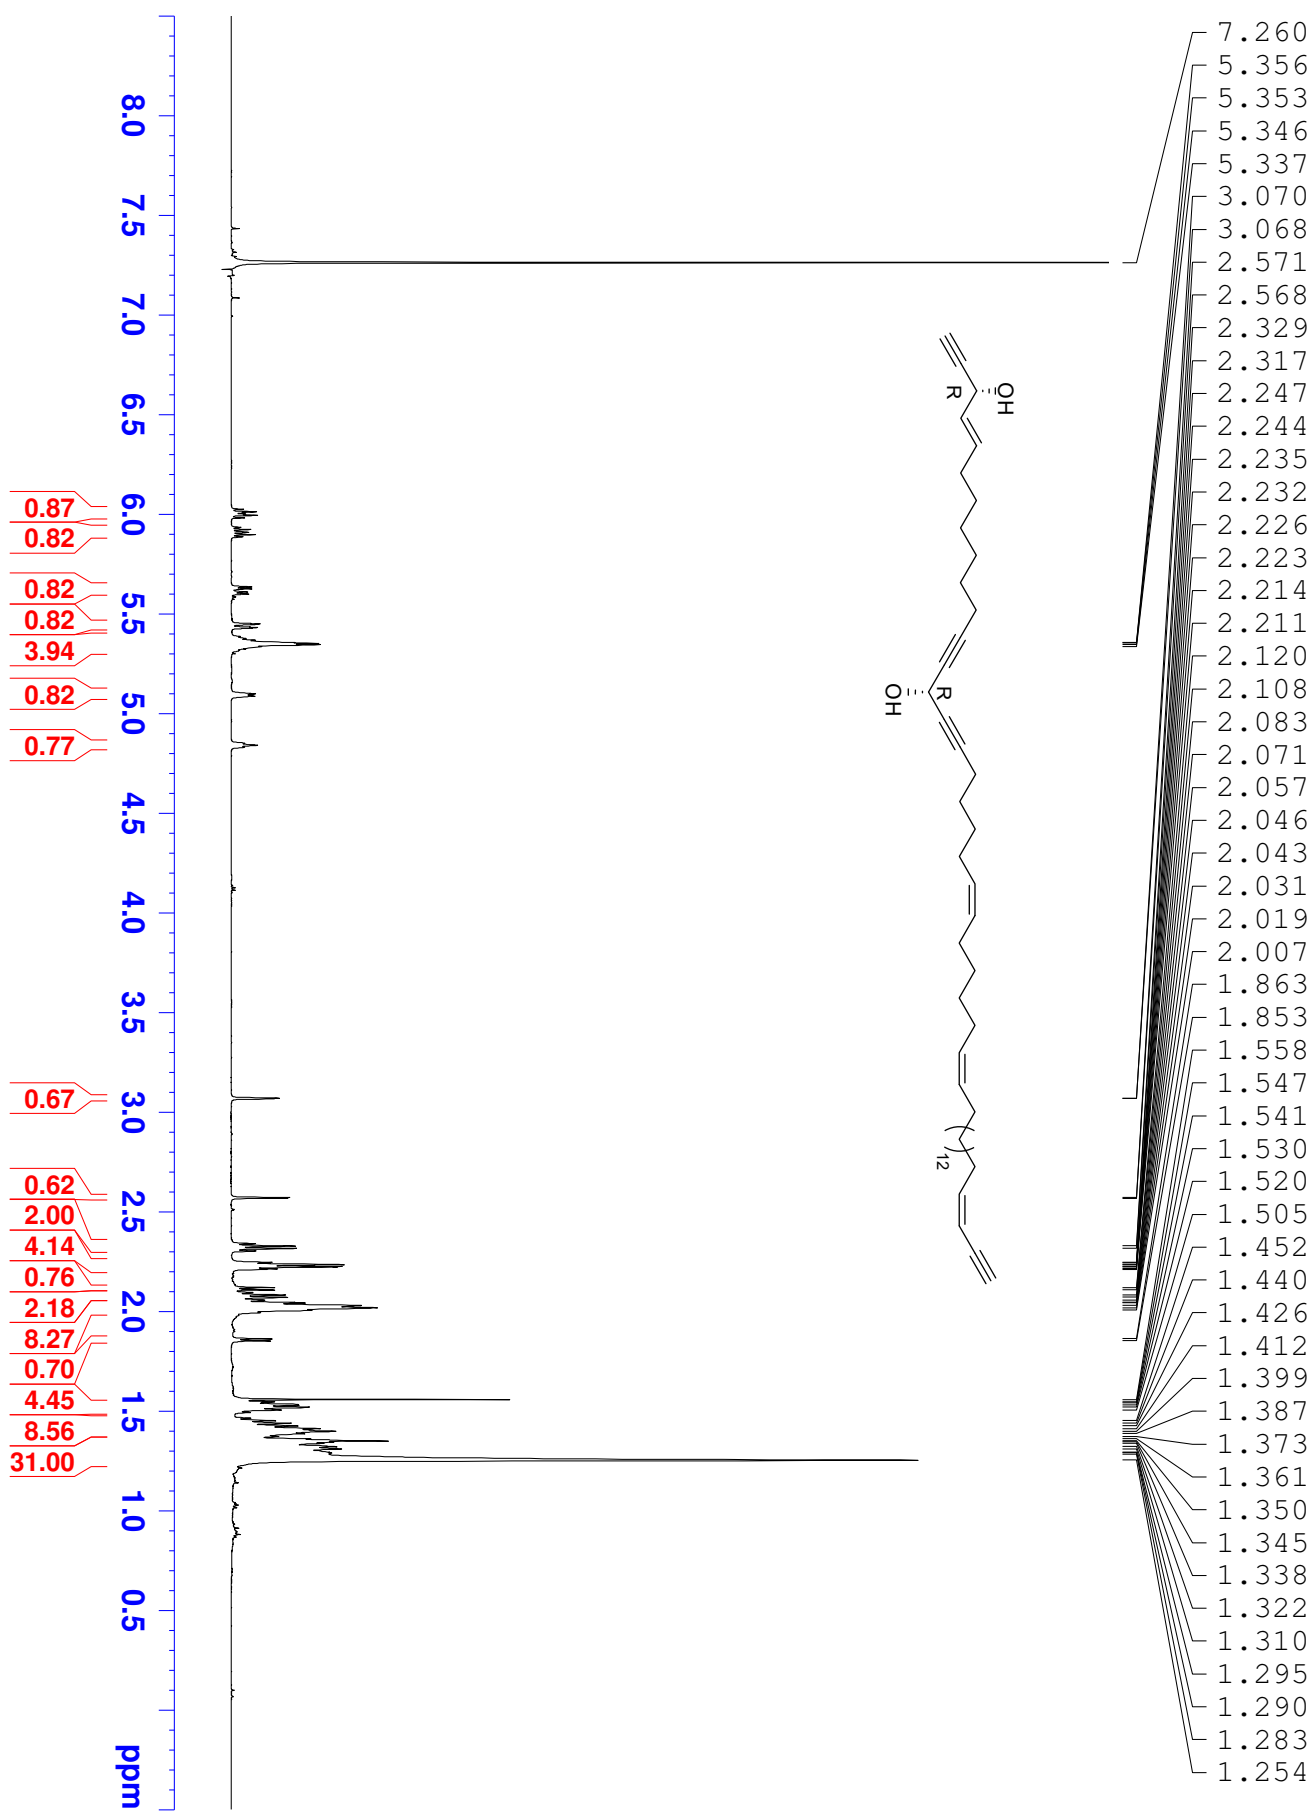



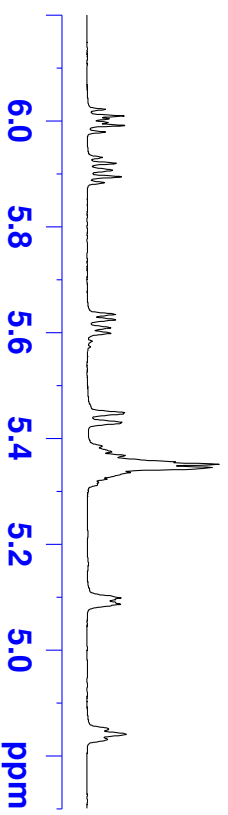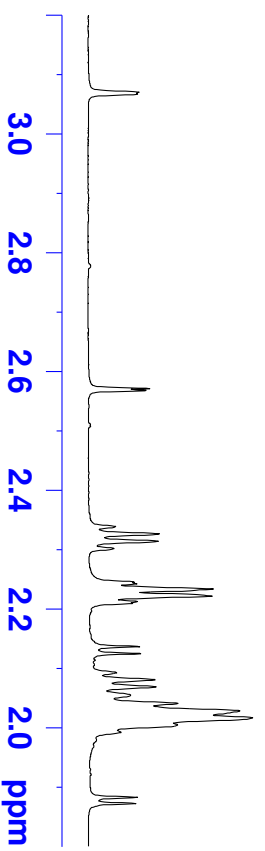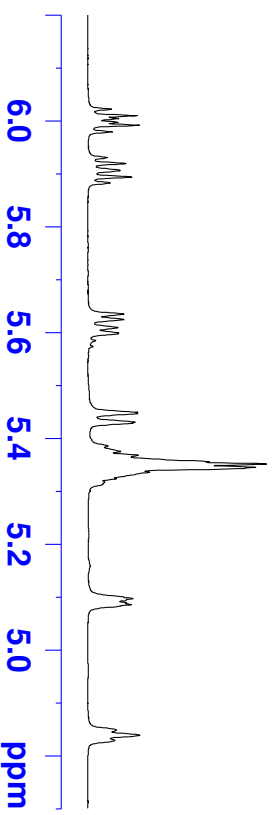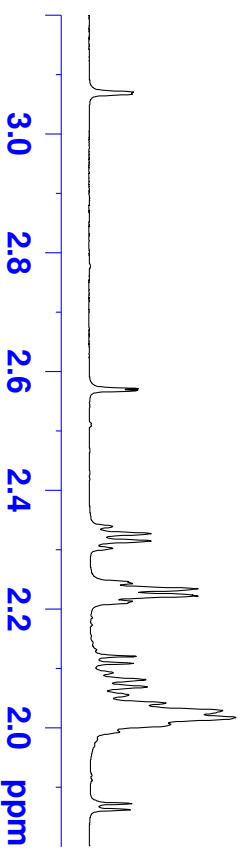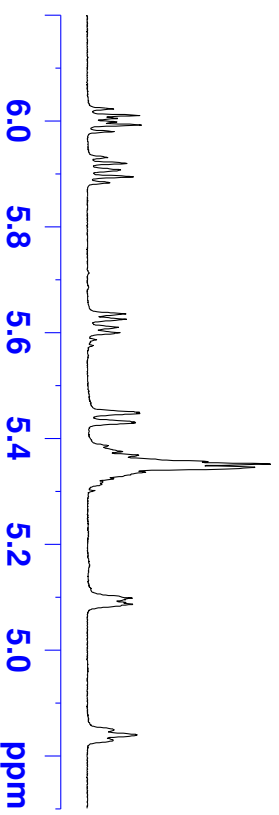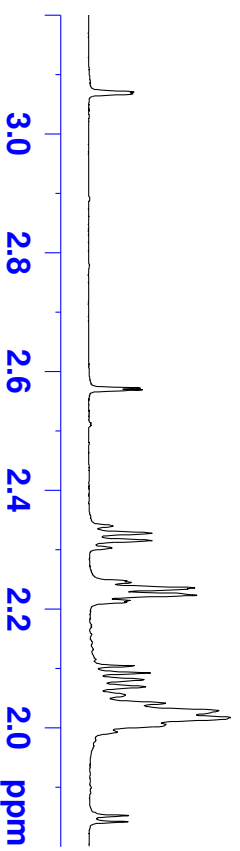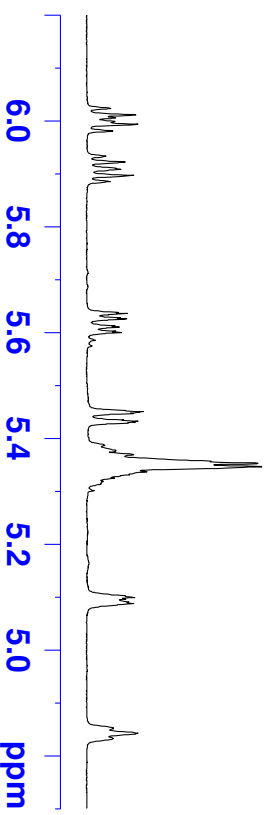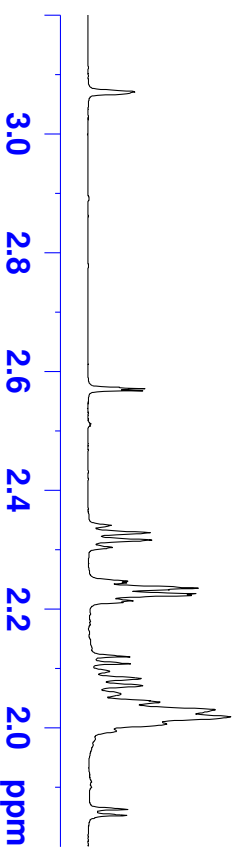

BS5P40 Peak1 MeOD 700 Bins 08/26/08

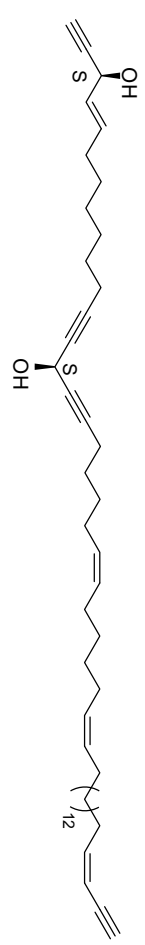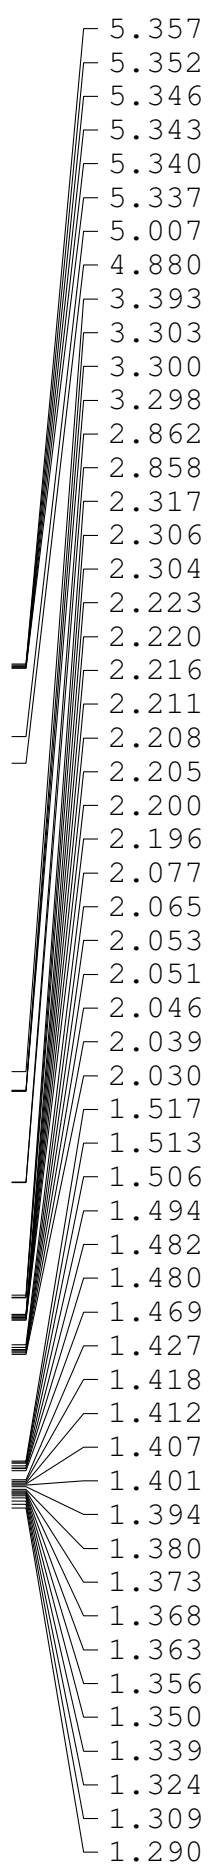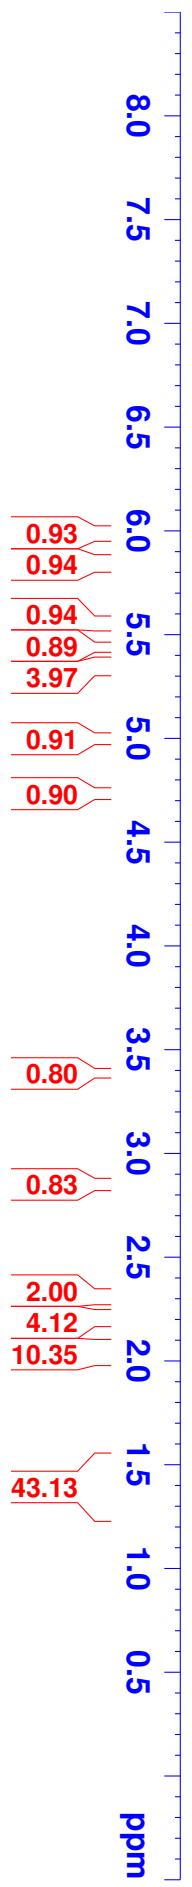



BS5P40 peak 2 Rf(0, 4) After deprotection MeOD 600 Bins 01/24/09

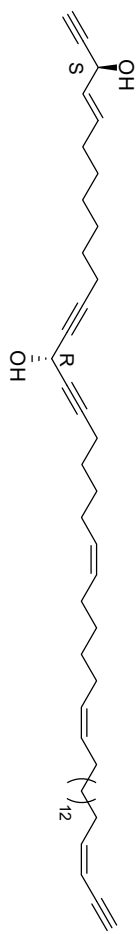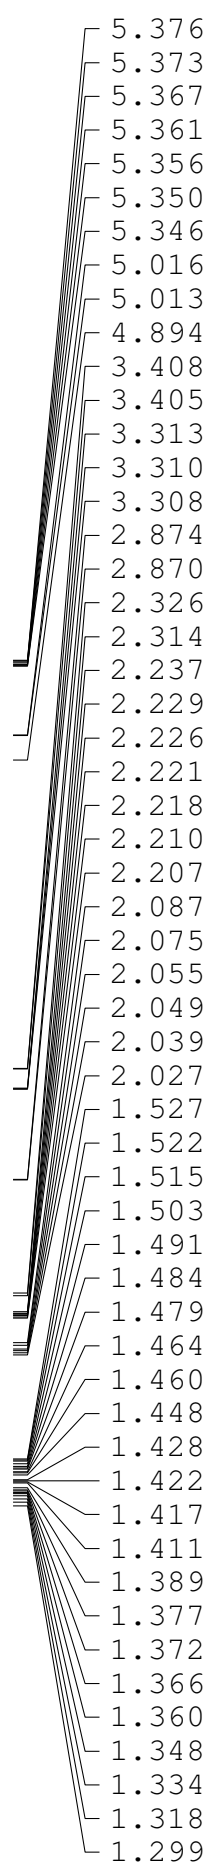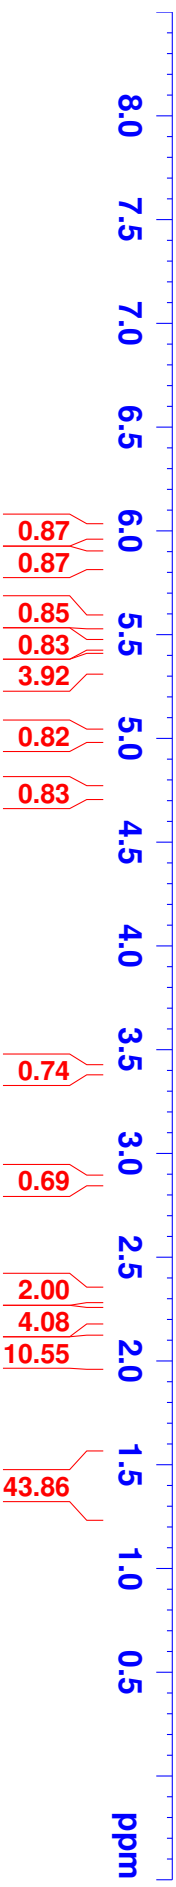





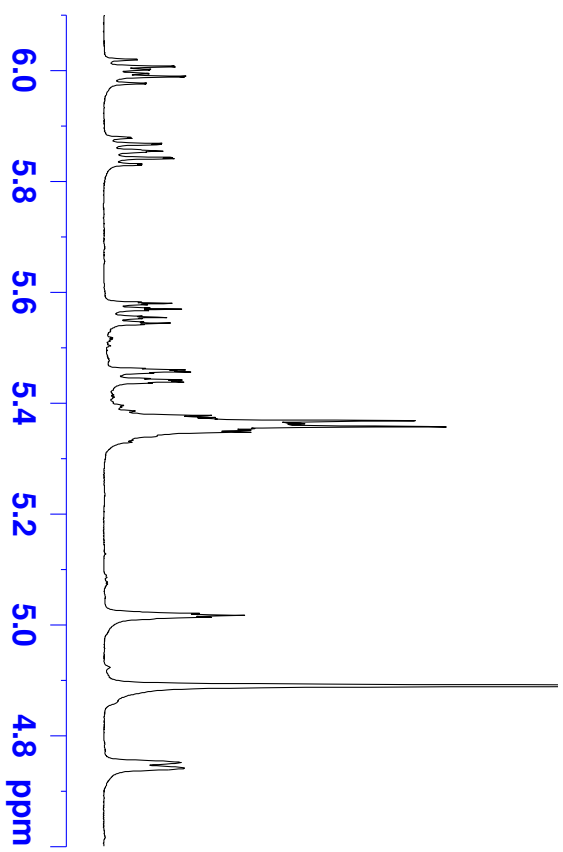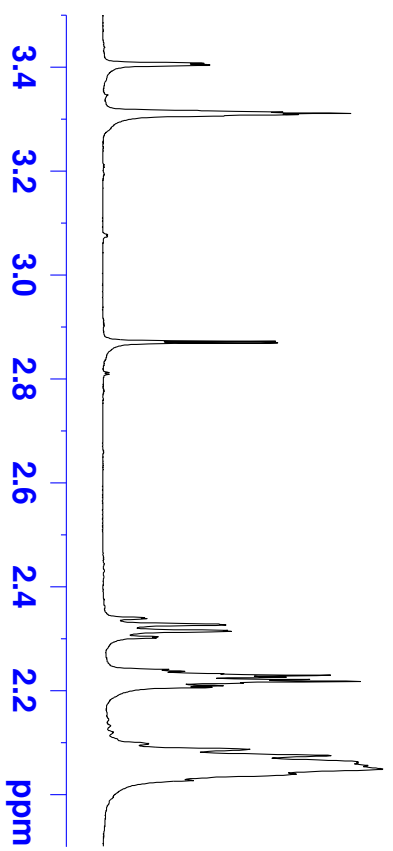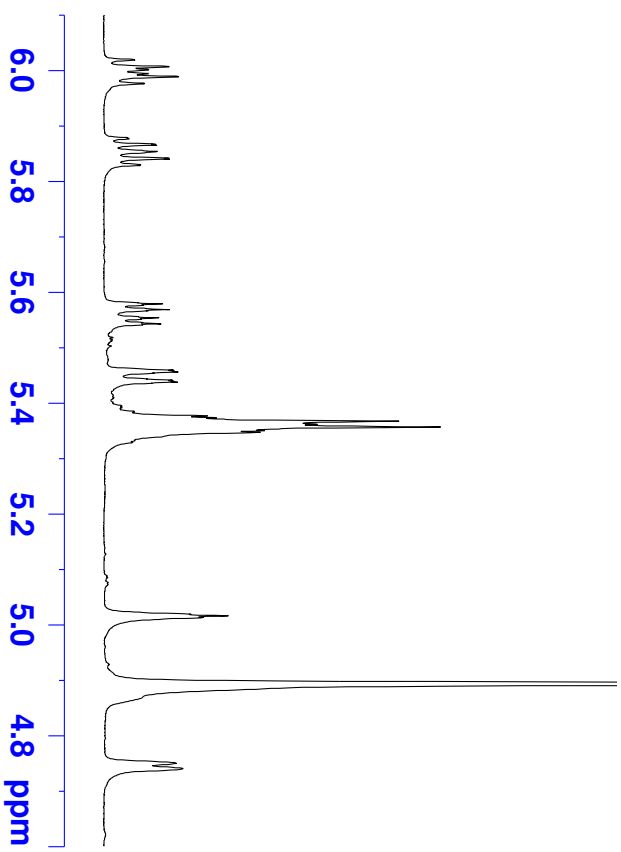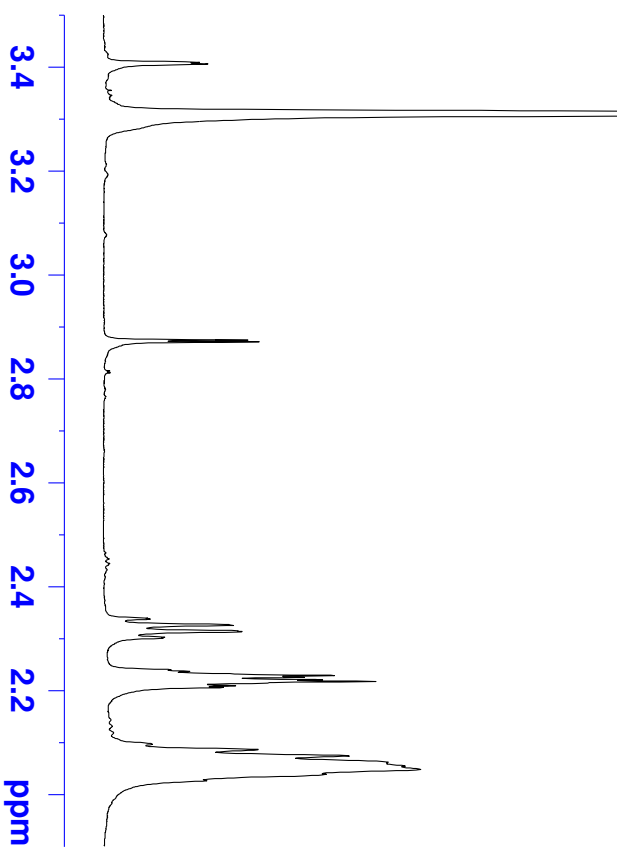

BS5P151 SS+S 700 CDCl3

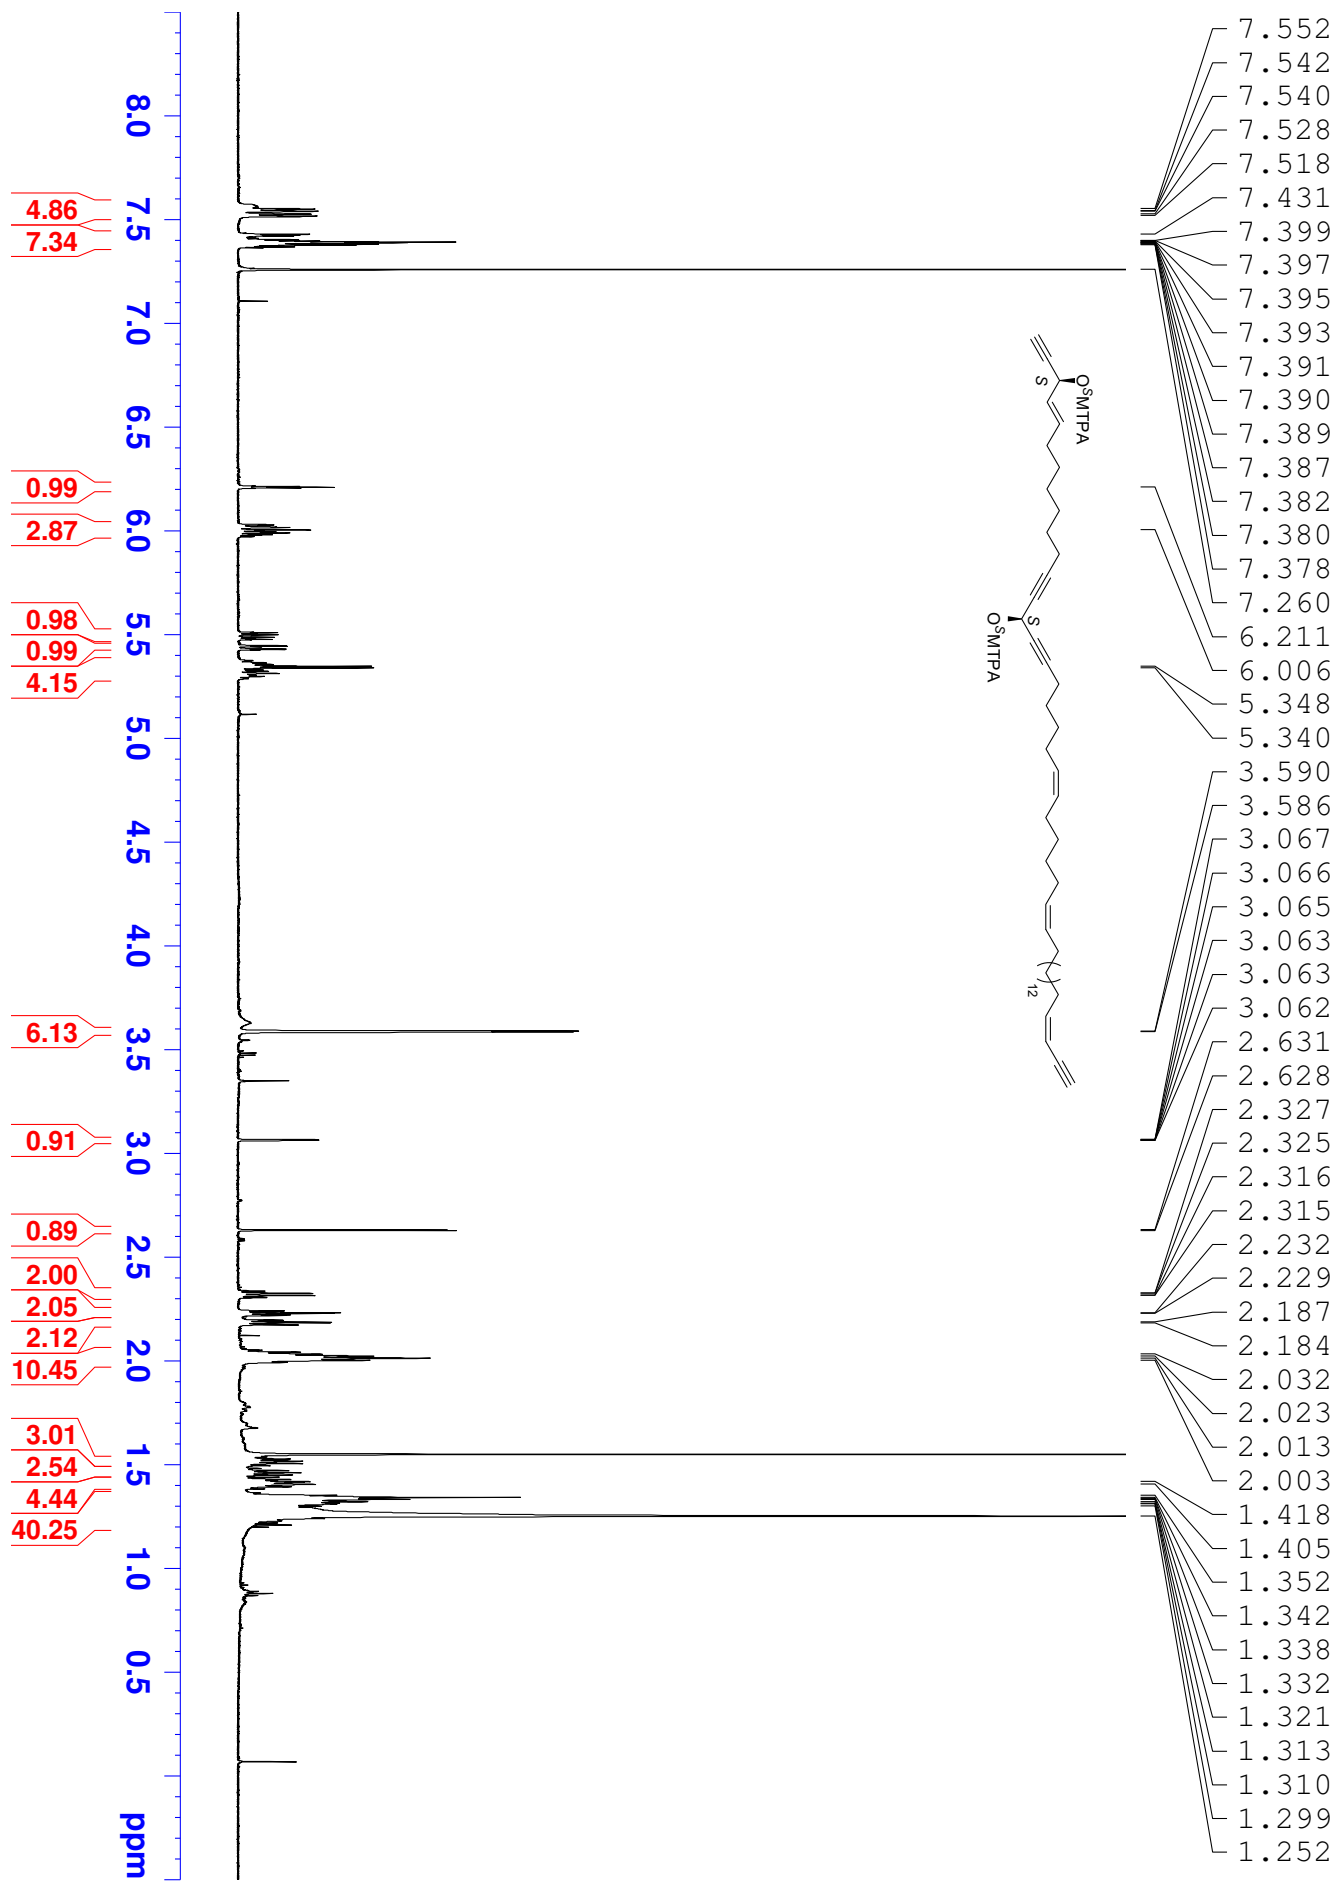

BS5P150 SS+R 700 CDCl3

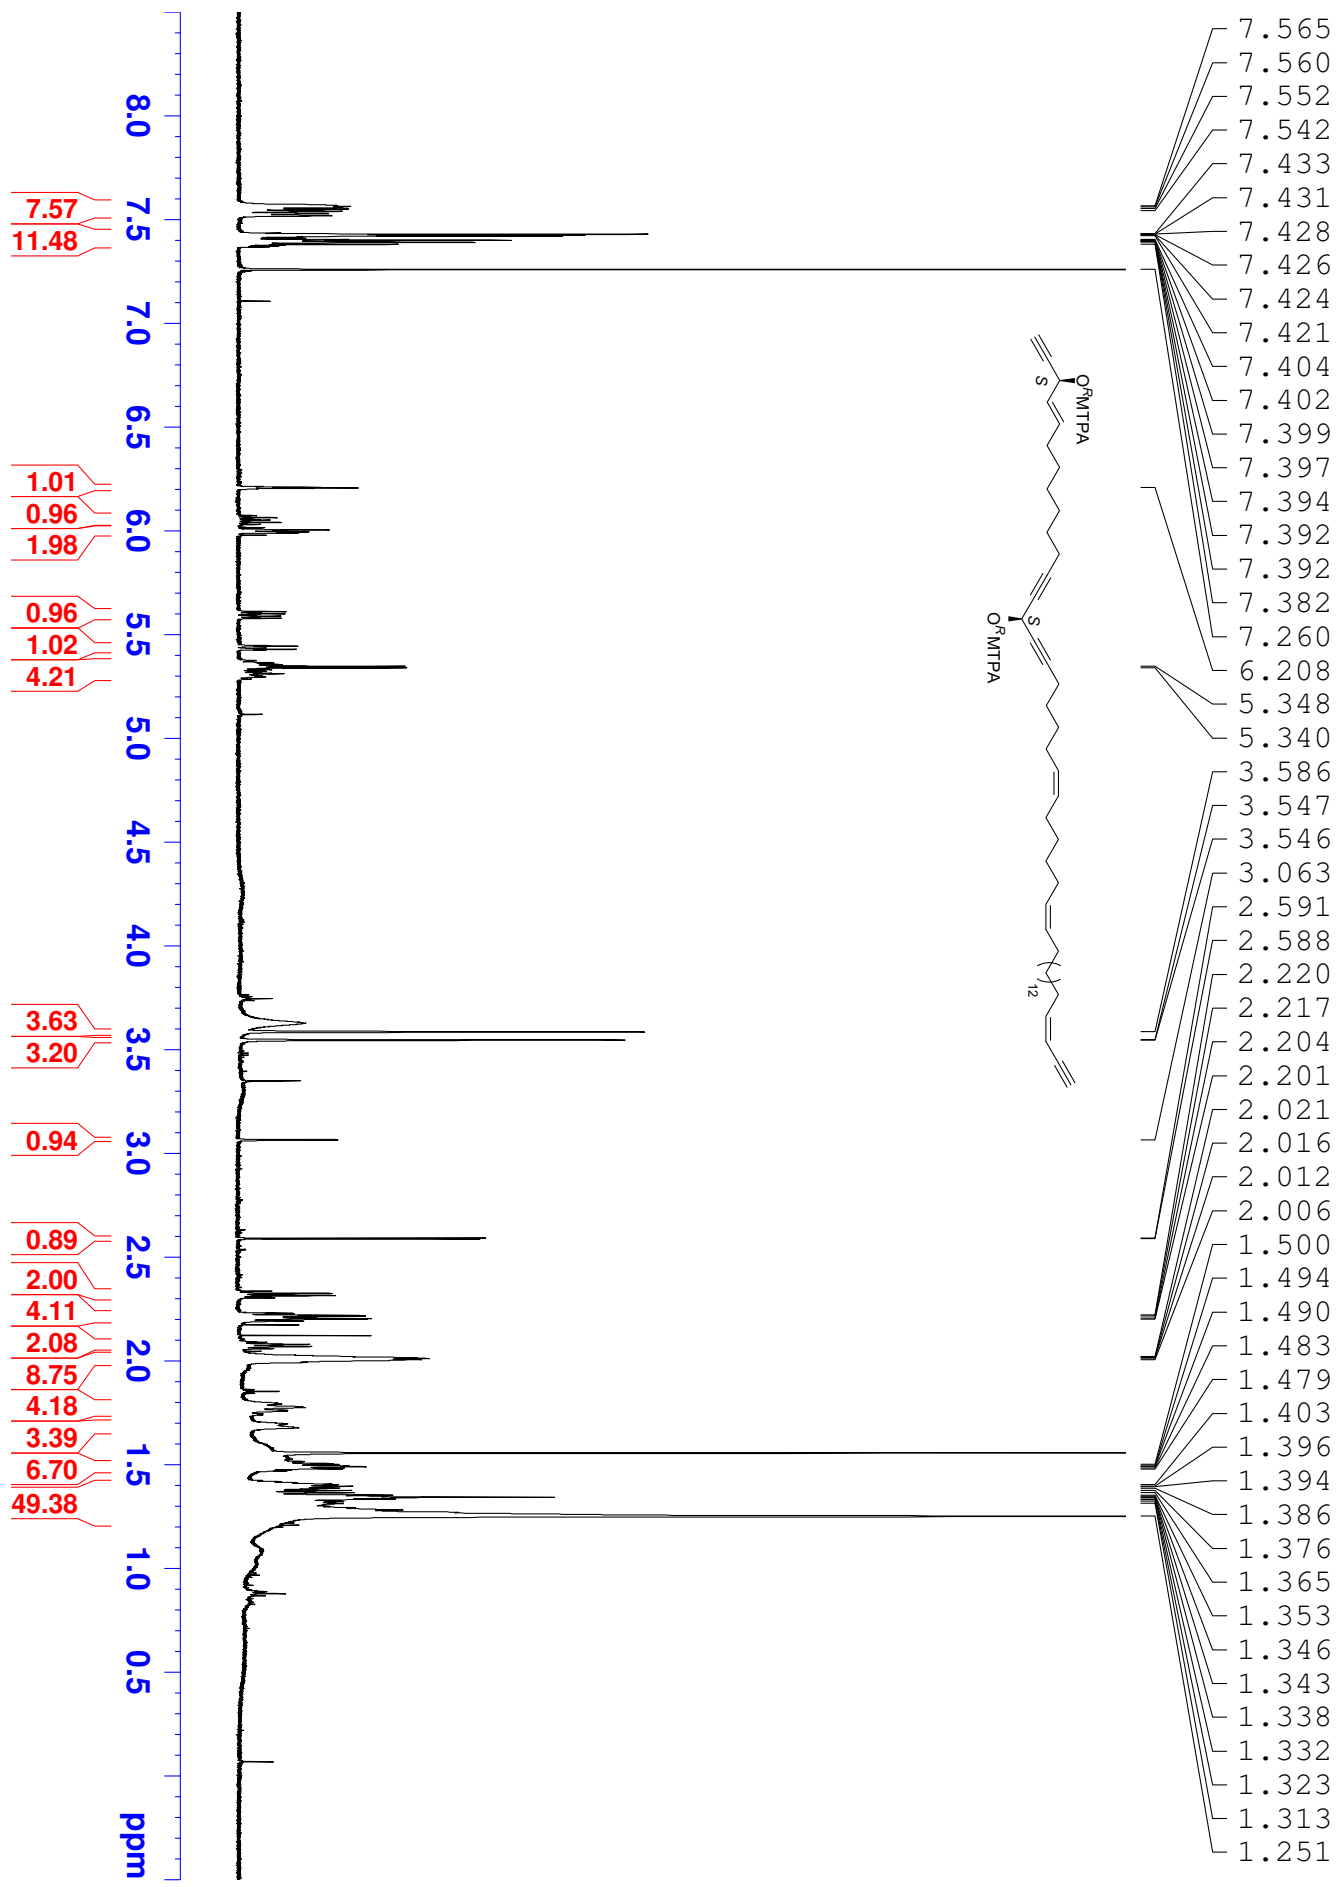

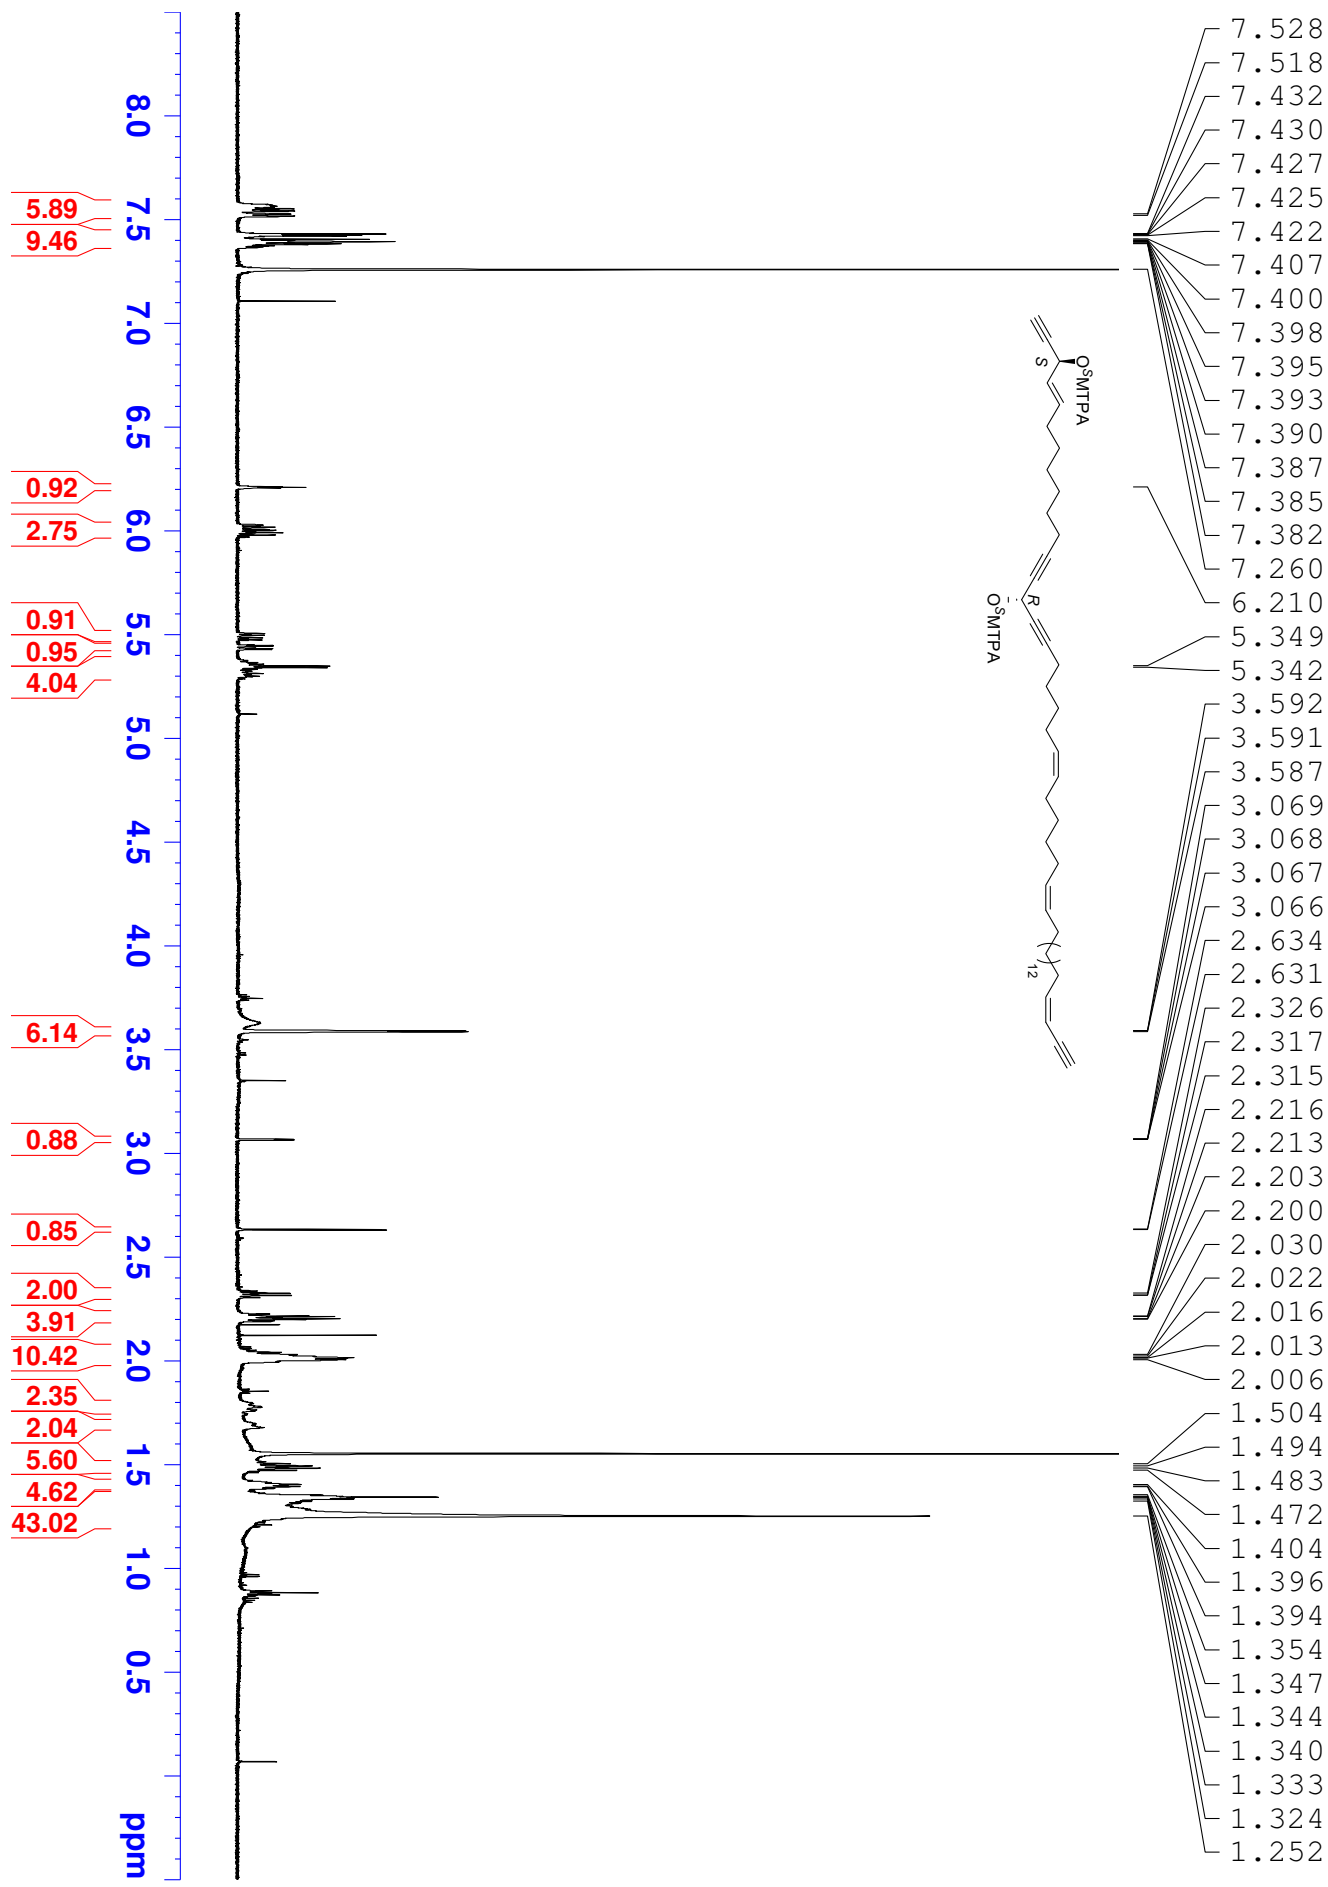

BS5P148 SR+R CDCl3 700

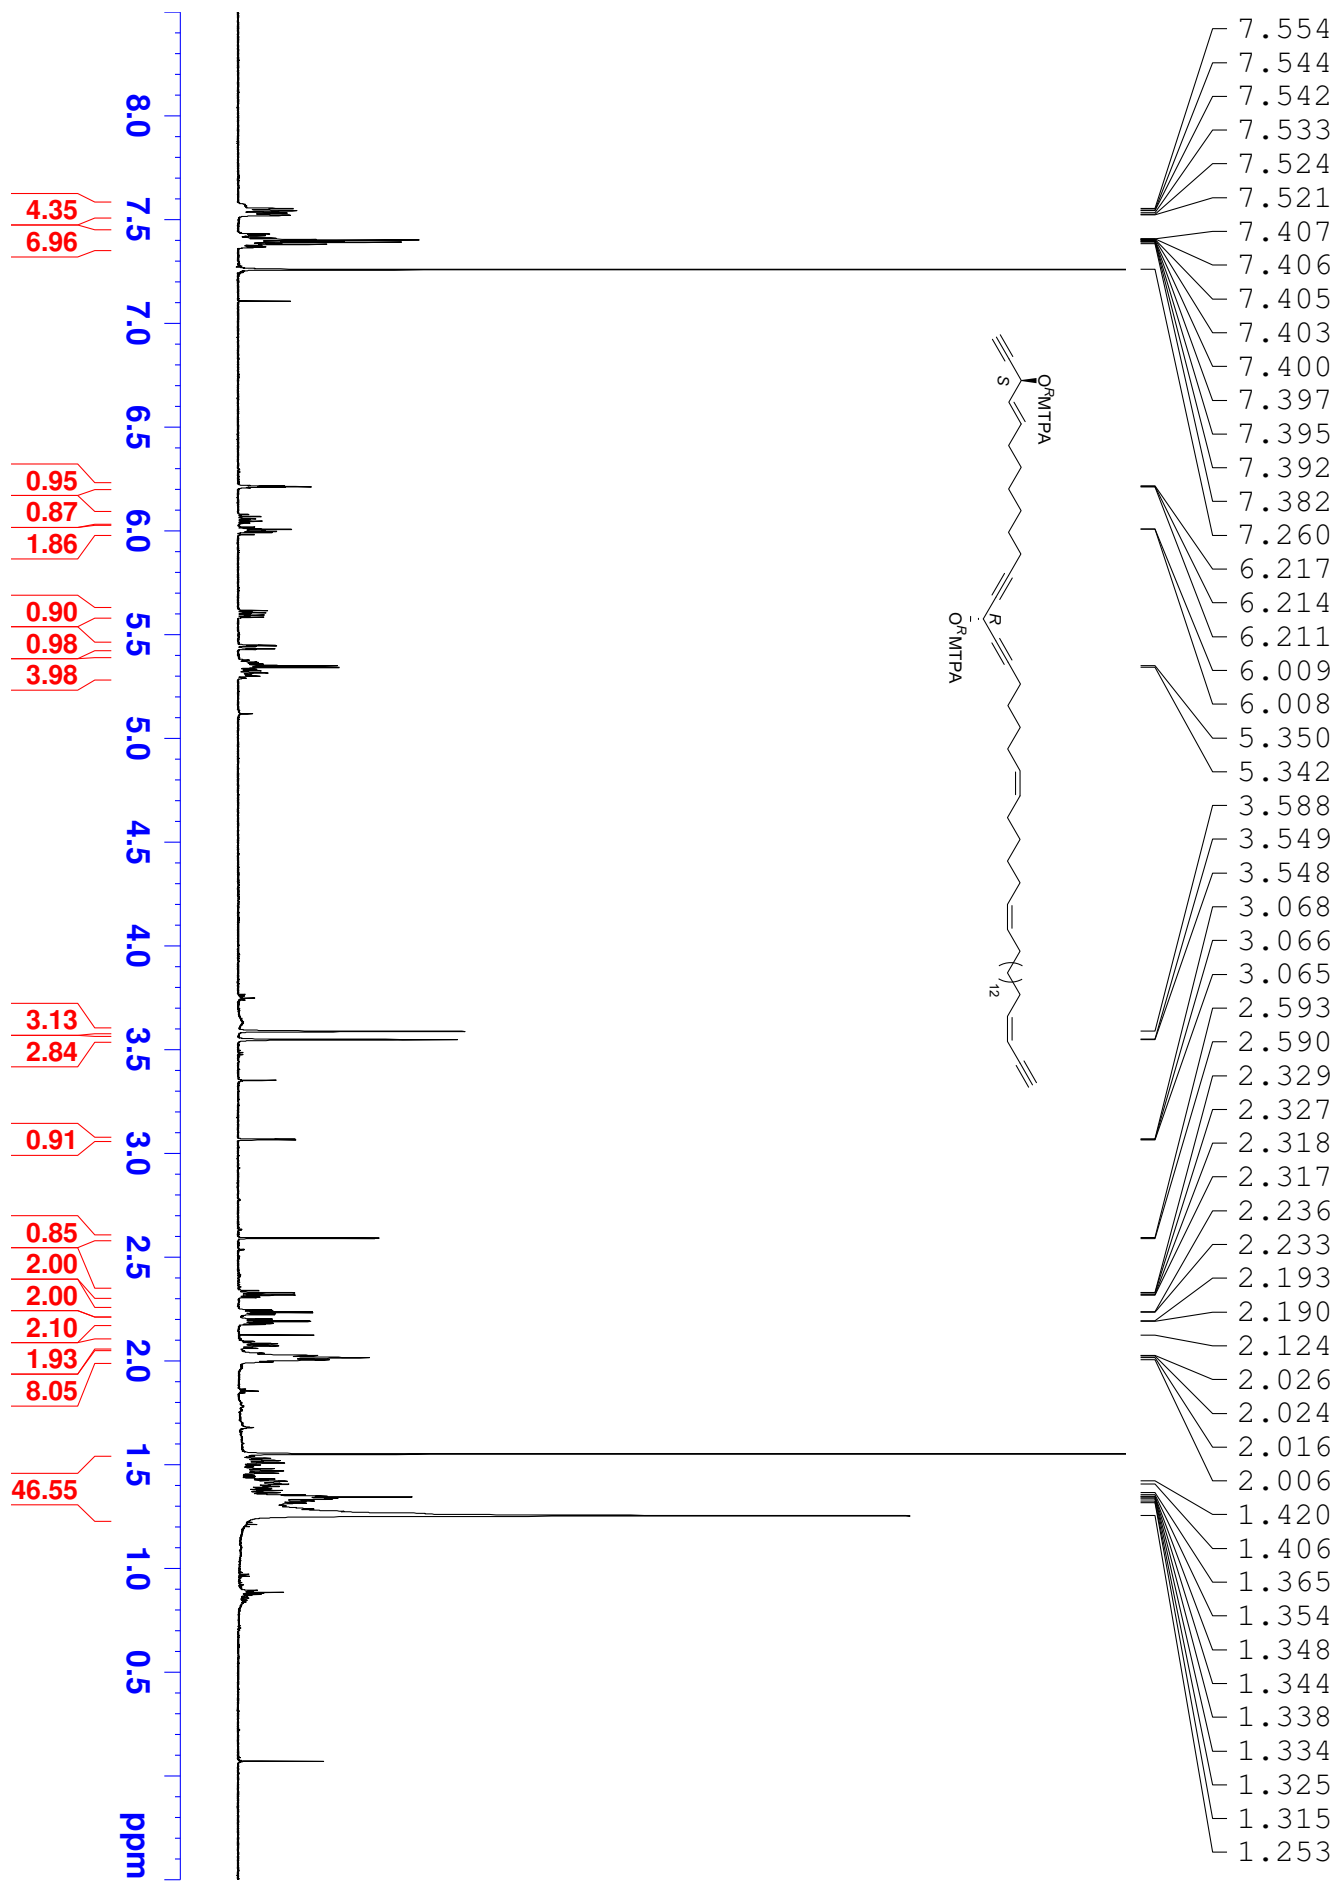

BS5P151 SS+S CDCl3 TOCSY 700

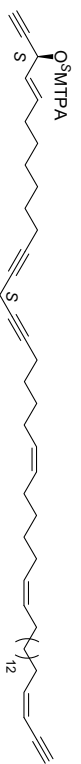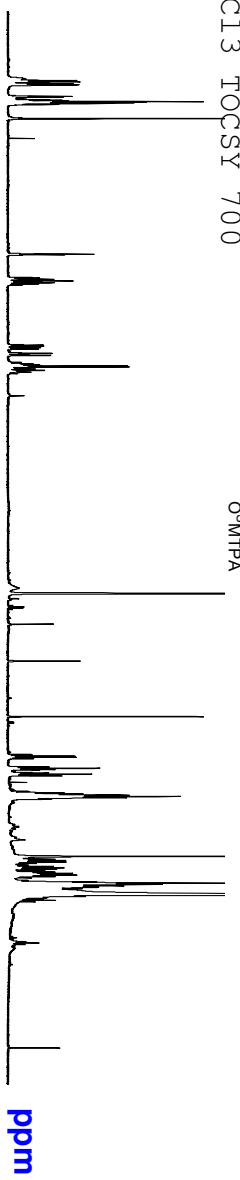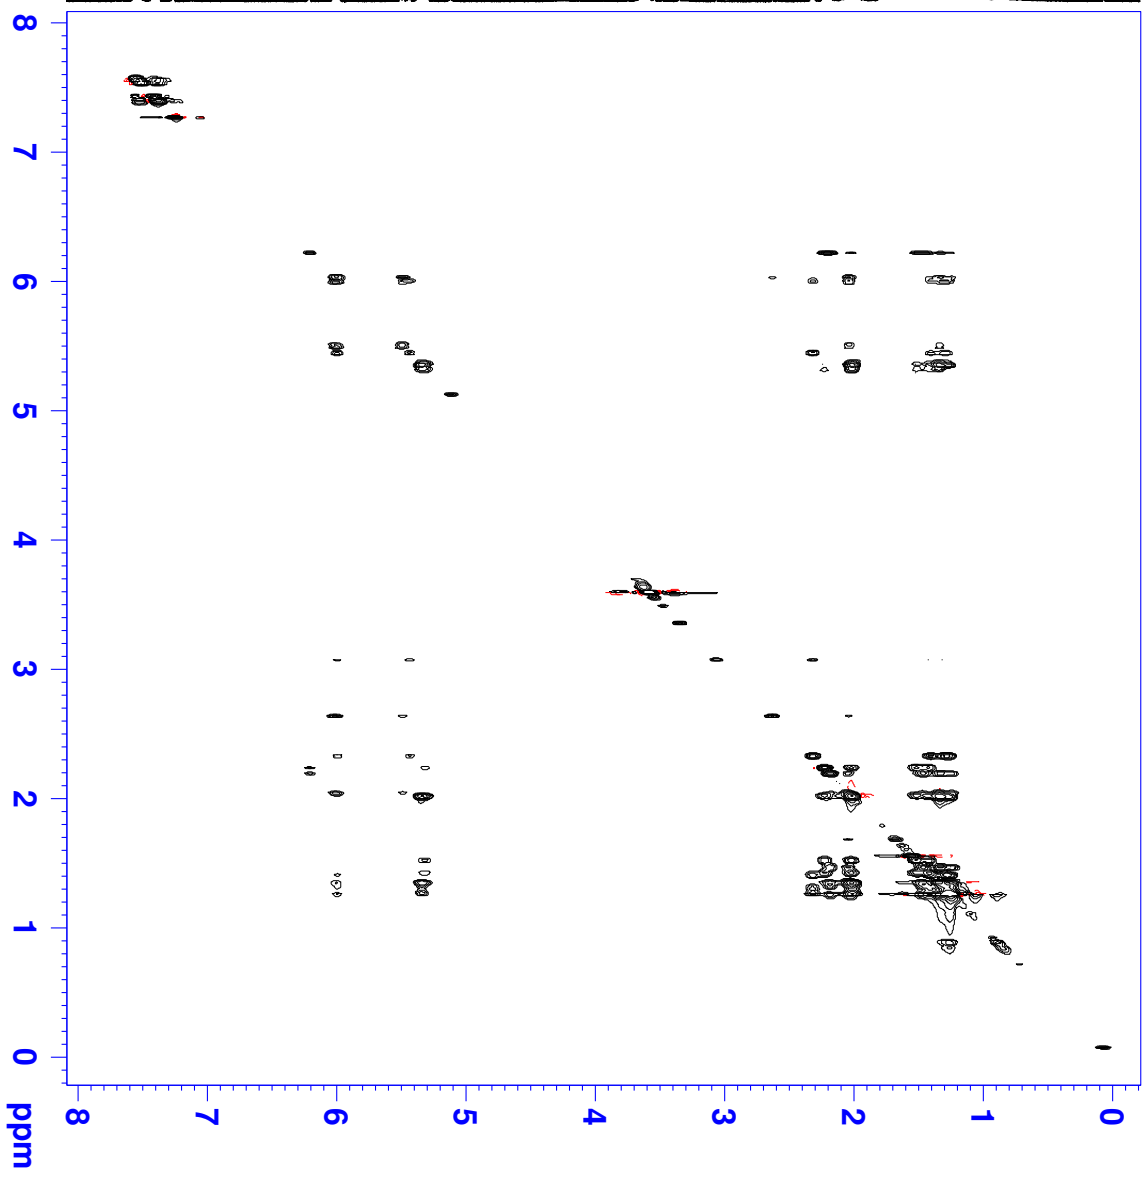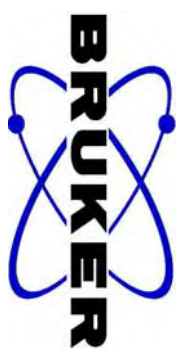

Current Data Parameters  
 NAME Bin\_BSSP151  
 EXPNO 5  
 PROCNO 1

F2 - Acquisition Parameters  
 Date\_ 20081008  
 Time 11.19

INSTRUM spect  
 PROBHD 5 mm PATXI 1H-

PULPROG mlevzlgp  
 TD 3072

SOLVENT CDCl3  
 NS 16

DS 16  
 SMH 5933.544 Hz

FIDRES 1.931492 Hz  
 AQ 0.2589172 sec

RG 645  
 DW 84.287 usec

DE 295.0 K  
 TE 0.00000300 sec

D0 2.00000000 sec  
 D1 0.12000000 sec

D9 0.05000000 sec  
 D11 0.00020000 sec

D12 0.00020000 sec  
 D16 0.00020000 sec

D18 0.00016925 sec  
 L1 86

BS5P150 SS+R CDCl3 TOCSY 700

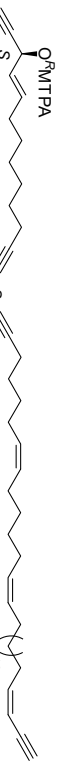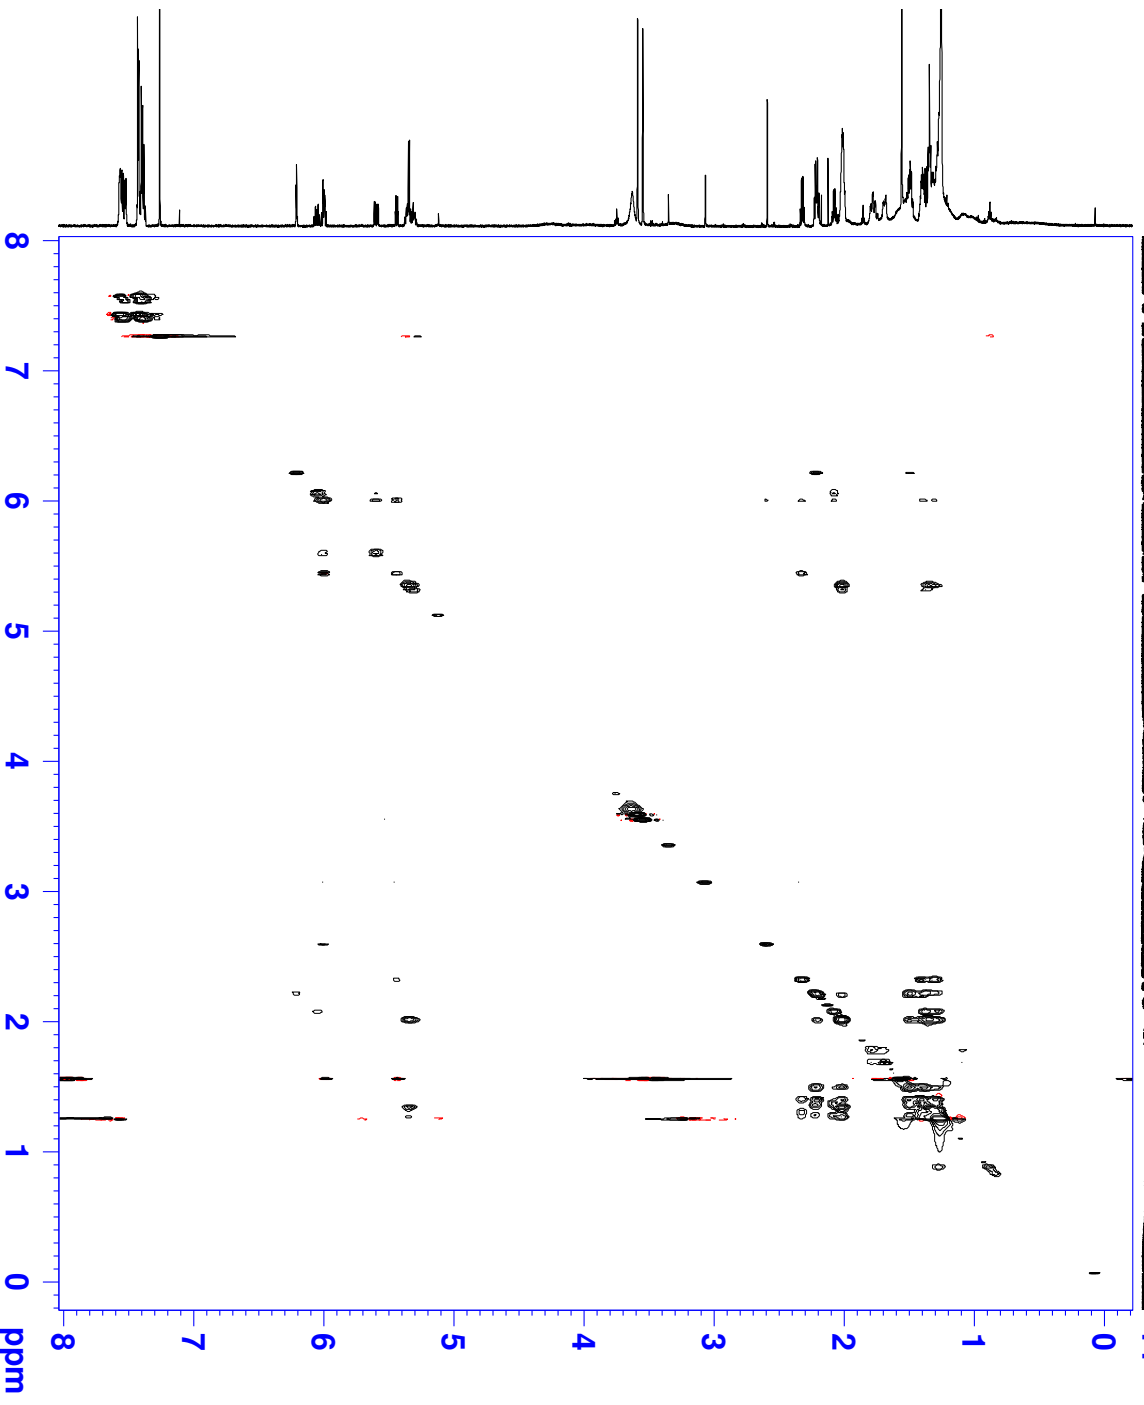

Current Data Parameters  
 NAME Bin\_BS5P150  
 EXPNO 2  
 PROCNO 1

F2 - Acquisition Parameters  
 Date\_ 20081023  
 Time 11.19

INSTRUM spect  
 PROBHD 5 mm PATXI 1H-  
 PULPROG mlevetqg  
 TD 4096

SOLVENT CDCl3  
 NS 16  
 DS 16

SWH 5813.954 Hz  
 FIDRES 1.419422 Hz  
 AQ 0.3523060 sec

RG 406  
 DW 86.000 usec  
 DE 6.50 usec  
 TE 293.7 K

D0 0.00000300 sec  
 D1 2.00000000 sec  
 D9 0.05000000 sec

D11 0.05000000 sec  
 D12 0.00020000 sec  
 D16 0.00020000 sec  
 INO 0.00017290 sec

LI 30  
 ===== CHANNEL f1 =====  
 NUC1 1H  
 P1 8.06 usec  
 P2 16.12 usec  
 P5 17.34 usec  
 P6 26.00 usec  
 P7 52.00 usec  
 P17 2500.00 usec  
 P18 2.40 dB  
 P19 12.57 dB  
 P19W 13.05232048 W  
 P19W 1.25512731 W  
 SFO1 700.1327375 MHz

===== GRADIENT CHANNEL =====  
 GPMAM1 SINE:100  
 GPMAM2 SINE:100  
 GPZ1 30.00 %  
 GPZ2 30.00 %  
 P16 1000.00 usec

F1 - Acquisition parameters  
 ND0 1  
 TD 256  
 SFO1 700.1327 MHz  
 FIDRES 22.710829 Hz  
 SW 8.304 ppm  
 FMODE Echo-Antlecho

F2 - Processing parameters  
 SI 4096  
 SF 700.1300215 MHz  
 MDM QSINE  
 SSB 2  
 LB 0.00 Hz  
 GB 0  
 PC 1.00

F1 - Processing parameters  
 SI 1024  
 MC2 echo-antlecho  
 SF 700.1300176 MHz  
 WDM QSINE  
 SSB 2  
 LB 0.00 Hz  
 GB 0



BS5P149 SR+S CDCl3 TOCSY 700

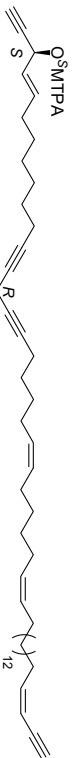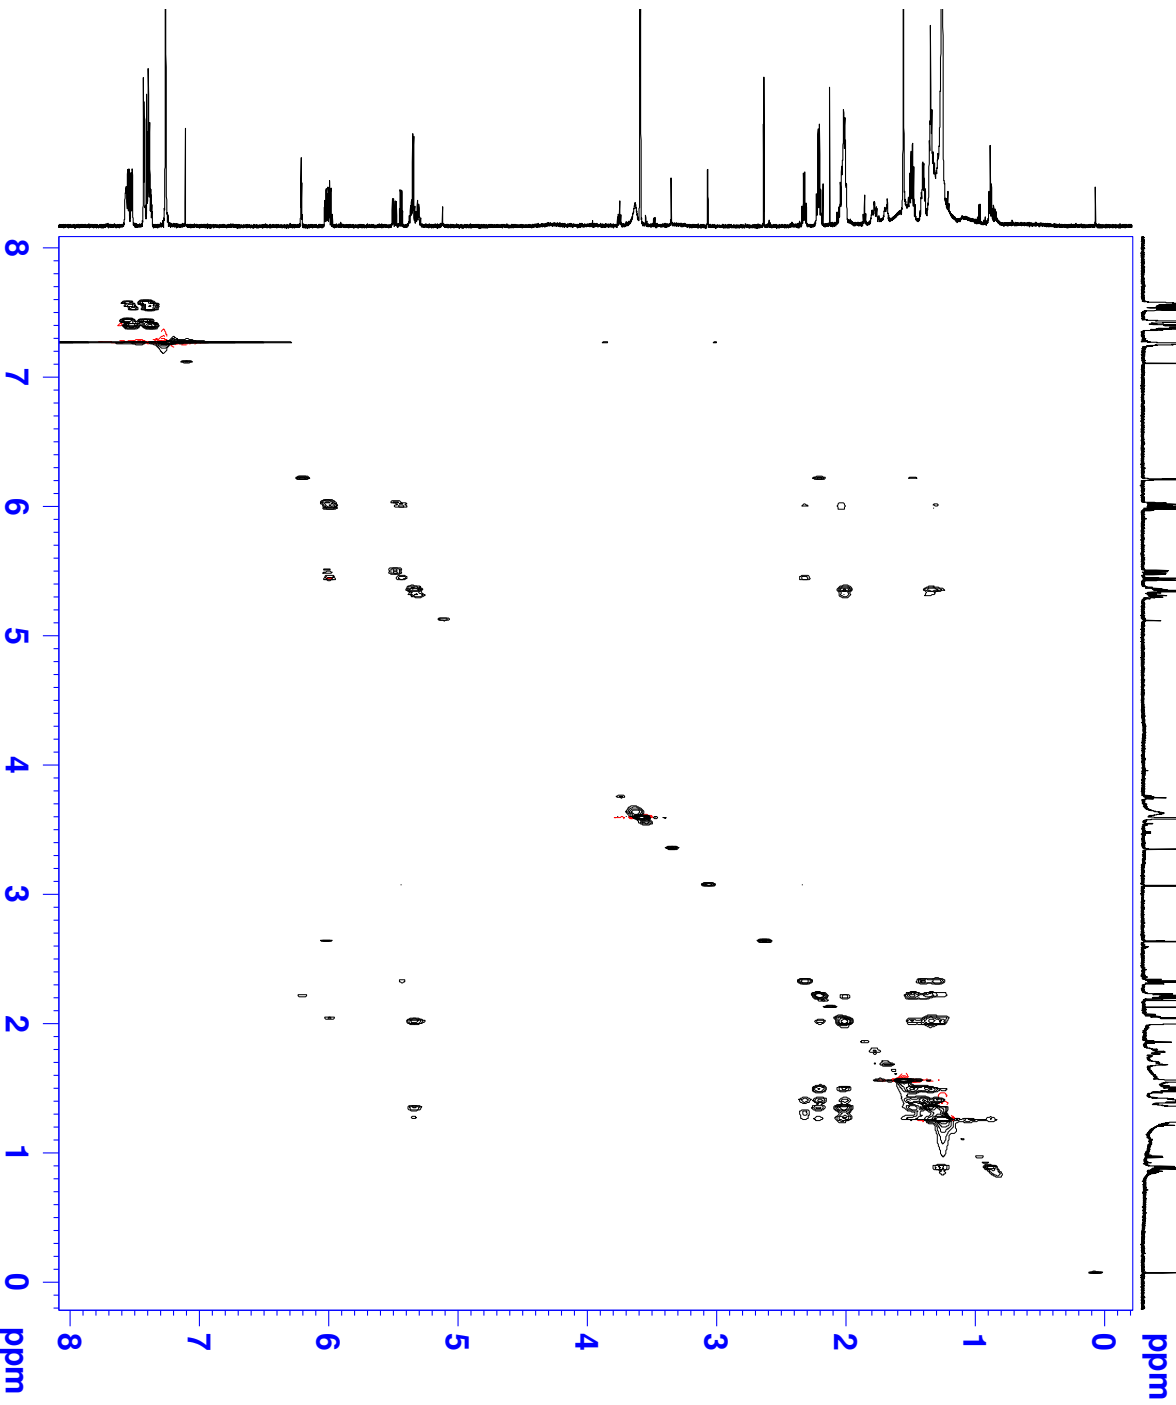

Current Data Parameters  
 Name Bin\_BS5P149  
 ExpNO 1  
 ProcNO 1

F2 - Acquisition Parameters  
 Date\_ 20081021  
 Time 17.44

INSTRUM spect  
 PROBHD 5 mm PATXI 1H-  
 PULPROG mlevetqg  
 TD 4096  
 SOLVENT CDCl3  
 NS 16  
 DS 16  
 SWH 5933.544 Hz  
 FIDRES 1.448619 Hz  
 AQ 0.3452063 sec  
 RG 645  
 DW 84.287 usec  
 DE 6.90 usec  
 TE 293.0 K

==== CHANNEL f1 =====  
 NUC1 1H  
 P1 8.09 usec  
 P2 16.18 usec  
 P5 17.34 usec  
 P6 26.00 usec  
 P7 52.00 usec  
 P17 2500.00 usec  
 P18 2.40 dB  
 P19 12.54 dB  
 P19W 13.05232048 W  
 P19W 1.26382732 W  
 SFO1 700.1327585 MHz  
 L1 30  
 INO 0.0002000 sec  
 D16 0.0002000 sec  
 D18 0.0002000 sec  
 D12 0.0500000 sec  
 D11 0.0500000 sec  
 D9 0.0500000 sec  
 D1 2.0000000 sec  
 D0 0.0000000 sec  
 TE 293.0 K  
 DE 6.90 usec  
 DW 84.287 usec  
 RG 645  
 AQ 0.3452063 sec  
 FIDRES 1.448619 Hz  
 SWH 5933.544 Hz  
 DS 16  
 NS 16

==== GRADIENT CHANNEL =====  
 GPMAM1 SINE.100  
 SINE.100  
 GPMAM2 SINE.100  
 SINE.100  
 GPZ1 30.00 %  
 GPZ2 30.00 %  
 P16 1000.00 usec

F1 - Acquisition parameters  
 ND0 256  
 TD 1  
 SFO1 700.1328 MHz  
 FIDRES 23.177950 Hz  
 SW 8.475 ppm  
 FMODE Echo-Antlecho

F2 - Processing parameters  
 SI 4096  
 SF 700.1300215 MHz  
 MDM QSINE  
 SSB 2  
 LB 0.00 Hz  
 GB 0  
 PC 1.00

F1 - Processing parameters  
 SI 1024  
 MC2 echo-antlecho  
 SF 700.1300227 MHz  
 WDM QSINE  
 SSB 2  
 LB 0.00 Hz  
 GB 0

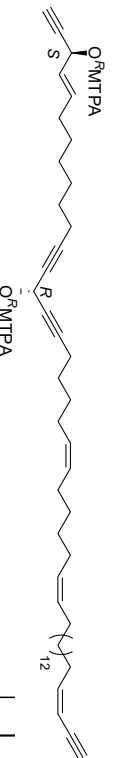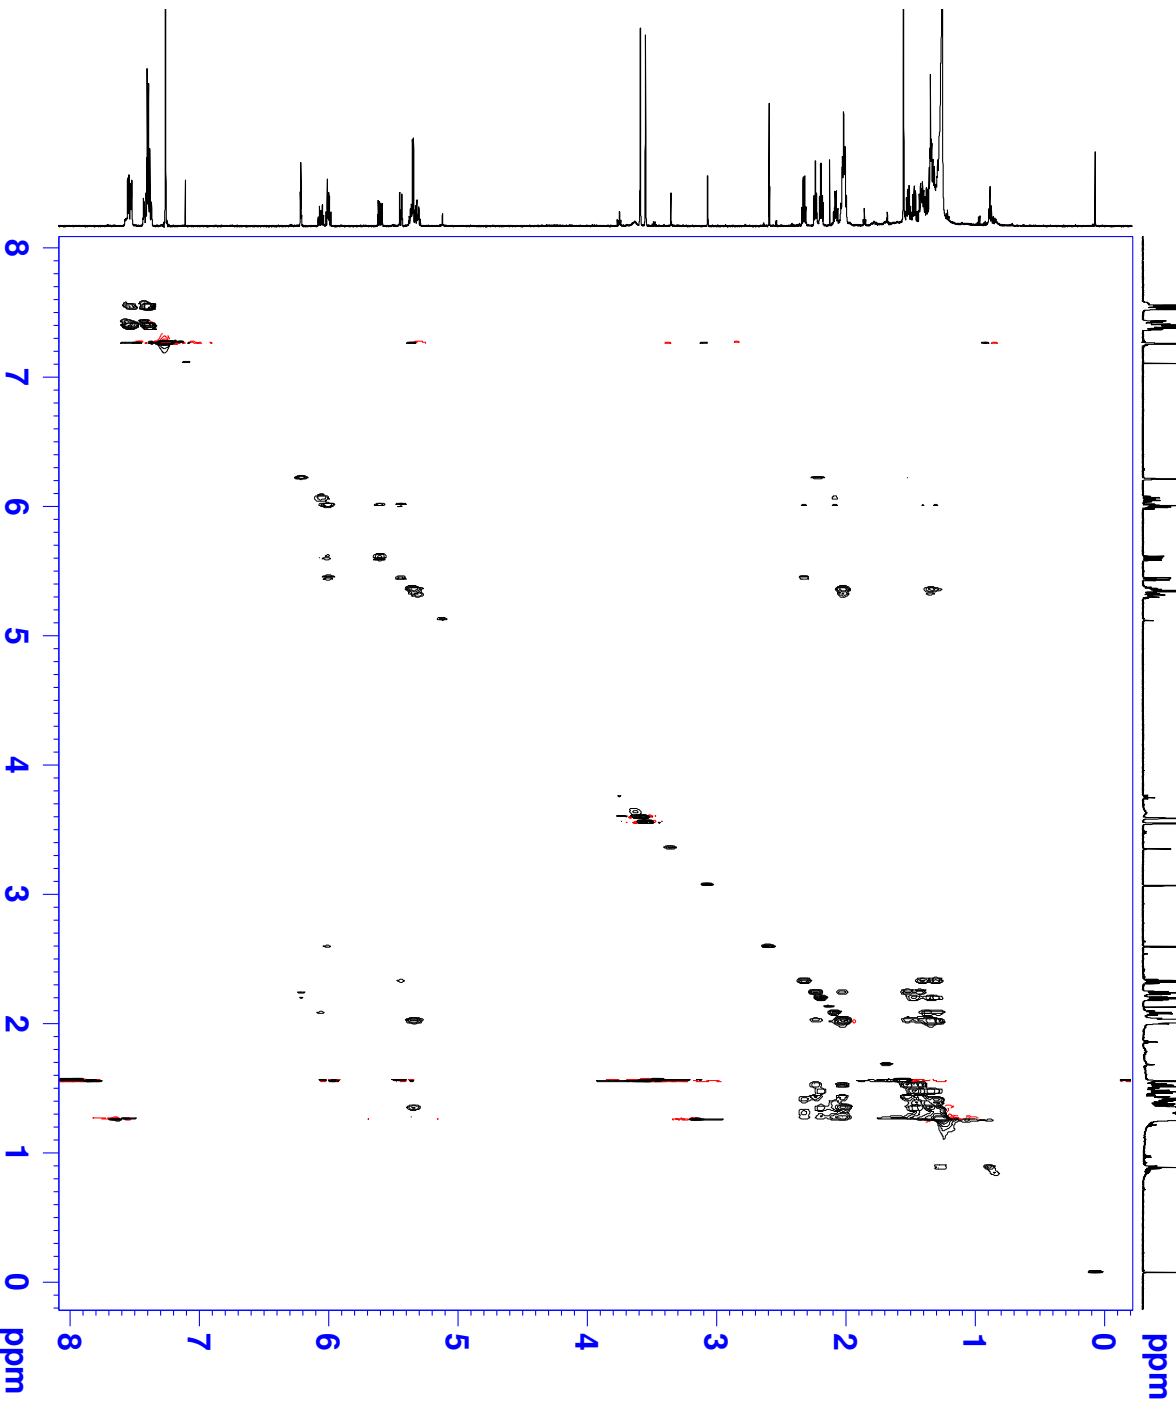

Current Data Parameters  
 NAME Bin\_BS5P148  
 EXPNO 1  
 PROCNO 1

F2 - Acquisition Parameters

Date\_ 20081022  
 Time 13.45  
 INSTRUM spect  
 PROBHD 5 mm PATXI 1H-  
 PULPROG mleveltgp  
 TD 4096  
 SOLVENT CDCl3  
 NS 16  
 DS 16  
 SWH 5813.954 Hz  
 FIDRES 1.419422 Hz  
 AQ 0.3523060 sec  
 RG 645  
 DW 86.000 usec  
 DE 6.50 usec  
 TE 292.8 K  
 D0 0.00000300 sec  
 D1 2.00000000 sec  
 D9 0.05000000 sec  
 D11 0.05000000 sec  
 D12 0.0002000 sec  
 D16 0.0002000 sec  
 INO 0.00017290 sec  
 SI 30

==== CHANNEL f1 =====

NUC1 1H  
 P1 6.85 usec  
 P2 13.70 usec  
 P5 17.34 usec  
 P6 26.00 usec  
 P7 52.00 usec  
 P17 2500.00 usec  
 P11 2.40 dB  
 P110 13.99 dB  
 P11W 13.05232048 W  
 P11OW 0.90508169 W  
 SFO1 700.1327760 MHz

==== GRADIENT CHANNEL =====

GNAM1 SINE.100  
 SINE.100  
 GPMAM2 30.00 %  
 GPZ1 30.00 %  
 GPZ2 30.00 %  
 P16 1000.00 usec

F1 - Acquisition parameters

ND0 1  
 TD 256  
 SFO1 700.1328 MHz  
 FIDRES 22.710831 Hz  
 SW 8.304 ppm  
 FMODE Echo-Antlecho

F2 - Processing parameters

SI 2048  
 SF 700.1300209 MHz  
 MDM QSINE  
 SSB 2  
 LB 0.00 Hz  
 GB 0  
 PC 1.00

F1 - Processing parameters

SI 1024  
 MC2 echo-antlecho  
 SF 700.1300213 MHz  
 WDM QSINE  
 SSB 2  
 LB 0.00 Hz  
 GB 0
